# Supplementary material for: Effect of a Co-Located Bridging Recovery Initiative on Hospital Length of Stay Among Patients With Opioid Use Disorder: The BRIDGE Randomized Clinical Trial
Source: PubMed Central journal article supplement (PMC10900965; doi:10.1001/jamanetworkopen.2023.56430), 2024-02-27
Supplement: jamanetwopen-e2356430-s001.pdf [file jamanetwopen-e2356430-s001.pdf]

1 Supplementary Material

2 Table of Contents

3 eSupp1 – Study Protocol ..... 2

4 eSupp2 – Statistical Analysis Plan ..... 11

5 eSupp3 – Statistical Analysis Report ..... 19

6

8

9

## Evaluating the Impact of the Bridge Clinic in Patients with Opioid Use Disorder

10

11

12

13

14

15

16

17

18

19

20

21

22

23

24

25

26

27

28

29

30

31

32

33

34

35

36

37

38

39

40

41

42

43

44

45

46

47

48

49

50

51

52

**David Marcovitz, M.D., Assistant Professor  
Department of Psychiatry  
Vanderbilt University Medical Center**

Sub-Investigators and their affiliations:

Patty W. Wright, M.D.  
Professor, Division of Infectious Diseases, Department of Medicine, VUMC

Katie D. White, M.D., Ph.D.  
Assistant Professor, Division of Infectious Diseases, Department of Medicine, VUMC

Cody Chastain, M.D.  
Assistant Professor, Division of Infectious Diseases, Department of Medicine, VUMC

William Sullivan, M.Ed., M.D.  
Hugh J. Morgan Chief Resident, Nashville VA Medical Center, Division of General Internal  
Medicine and Public Health

Heather Limper, M.P.H., Ph.D.  
Research Assistant Professor of Medicine, Associate Director, Implementation Science Core,  
Assistant Director for Operations, CCQIR, VUMC

David Edwards, M.D., Ph.D.  
Chief, Pain Medicine, Assistant Professor, Division of Pain Medicine, Department of  
Anesthesiology, VUMC

Christina A. Fiske, M.P.H., M.D.  
Assistant Professor, Division of Infectious Diseases, Department of Medicine, VUMC

Christopher J. Lindsell, Ph.D.  
Professor of Biostatistics, Associate Director, Center for Clinical Quality and Implementation  
Research, Director, VICTR Research Methods Program, VUMC

Todd Rice, M.Sc., M.D.  
Associate Professor of Medicine, Department of Allergy/Pulmonary & Critical Care Medicine,  
Medical Director, Institutional Review Board, VUMC

53 **Table of Contents:**

54

55 **Study Schema**

- 56 1. **Study Summary**
- 57 2. **Background**
- 58 3. **Rationale and Specific Aims**
- 59 4. **Inclusion/Exclusion Criteria**
- 60 5. **Enrollment/Randomization**
- 61 6. **Study Procedures**
- 62 7. **Risks and Benefits**
- 63 8. **Reporting of Adverse Events or Unanticipated Problems involving Risk to**
- 64 **Participants or Others**
- 65 9. **Study Withdrawal/Discontinuation**
- 66 10. **Statistical Considerations**
- 67 11. **Privacy/Confidentiality Issues**
- 68 12. **Follow-up and Record Retention**

69

70 1. **Study Summary**71 **Title:** Evaluating the Impact of the Bridge Clinic in Patients with Opioid Use Disorder

72

73 **Study Aims:**

- 74 • Aim 1: To determine whether referral to the Bridge Clinic reduces overall index
- 75 hospital length of stay when compared to direct referral to a long-term outpatient
- 76 addiction provider for patients with active opioid use disorder (OUD) being
- 77 considered for medications-for-addiction treatment (MAT).
- 78 • Aim 2: To evaluate the effects of the same intervention in the same population on
- 79 secondary outcomes including costs, care-linkage, readmission rates, self-reported
- 80 buprenorphine or naltrexone fills, rate of known recurrent opioid use, and measures
- 81 of overall quality of life.
- 82 • Aim 3: Evaluate fidelity outcomes including Bridge Clinic acceptance and
- 83 attendance rates among those referred to Bridge Clinic and reasons why patients
- 84 were not considered to be eligible for inclusion.
- 85 • Aim 4: Among the subgroup of patients with an infection for which a course of IV
- 86 antibiotics is required, additionally evaluate whether access to the Bridge Clinic
- 87 facilitates outpatient management of the antibiotic therapy, with consequent
- 88 improvement in clinical (infection and mortality) and resource (inpatient days, time to
- 89 discharge following a negative blood culture) outcomes.

90

91 **Study Hypotheses:**

- 92 • **Primary:** Among patients with active OUD being considered for MAT, index
- 93 hospital length of stay will be shorter among patients randomized to referral to the
- 94 Bridge Clinic than among patients randomized to no referral to the Bridge Clinic.
- 95 • **Secondary:** Among patients with active OUD being considered for MAT, total
- 96 costs, readmission rates, and rate of recurrent opioid use will be lower while
- 97 successful care-linkage, self-reported buprenorphine or naltrexone prescription fill
- 98 rates and quality of life will be higher among patients randomized to referral to the
- 99 Bridge Clinic than among patients randomized to no referral to the Bridge Clinic.
- 100 • **Exploratory:** Among patients with active OUD being considered for MAT who also
- 101 have an infection requiring IV antibiotics, referral to the Bridge Clinic will result in
- 102 lower resource use without worse clinical outcomes when compared with not being
- 103 referred to the Bridge clinic.

104

105 **Study Population:** Inpatients with OUD being considered for medications-for-addiction  
106 treatment (MAT) who have not previously utilized Bridge Clinic.

107  
108 Due to COVID and the resulting changes in patient flow, we will temporarily suspend eligibility  
109 for the trial for OPAT patients as of December 3<sup>rd</sup>, 2020.

110  
111  
112 **Comparators:**

- 113 • Direct referral to a long-term outpatient addiction provider
- 114 • Referral to the Bridge Clinic while long-term outpatient addiction provider is  
115 located/identified

116  
117 **Randomization:** Randomization will occur at the individual patient level. Currently, the Bridge  
118 Clinic can only accept a limited number of patients. To learn from the care provided, we propose  
119 randomizing all patients eligible for referral to Bridge Clinic in a ratio such that the Bridge Clinic  
120 is at capacity. In this way, the choice to refer is unbiased and the strength of evidence is greatly  
121 enhanced.

122  
123 **Consent:** This study involves comparing two approaches to care: i) inpatient MAT  
124 (buprenorphine or naltrexone) with search for an outpatient MAT provider to accept the patient,  
125 or ii) inpatient MAT (buprenorphine or naltrexone) with referral to the Bridge Clinic to maintain  
126 the patient's care until a long-term outpatient MAT provider accepts the patient. Both  
127 approaches represent standard of care.

128  
129 It is not practicable to answer the research question with informed consent because patients  
130 who choose to participate will necessarily differ from those who do not in substantial ways,  
131 including access to care.

132  
133 We request a waiver of consent as 1) data for the research will be obtained from the medical  
134 record, financial systems, state-mandated reporting systems, and from routine standard of care  
135 telephonic outreach to patients, 2) we are comparing usual care practices, albeit with  
136 randomization, 3) there is no additional interaction with the participant for research purposes,  
137 and 4) it is impracticable to conduct the research with consent.

138  
139  
140 **2. Background**

141  
142 Opioid overdoses continued to increase in Tennessee in 2017, where rates of overdose already  
143 exceed the national average, and these trends were reflected in VUH admissions for opioid use  
144 disorder (OUD)-related problems, which were up 55% in the first 6 months of 2018 over 2017.<sup>1</sup>  
145 Vanderbilt is implementing several initiatives to improve outcomes in patients with OUD. On  
146 July 20<sup>th</sup>, 2018, a new Addiction Consult Team (ACT) went live at Vanderbilt. The service has  
147 completed 1,082 patient visits as of May 29<sup>th</sup> 2019 (373 new visits and 709 follow up  
148 visits). Additionally, we have created an outpatient "Bridge Clinic" at VUMC that is available to  
149 manage patients with OUD for a transitional period of up to 3 months following hospital  
150 discharge. ACT clinicians staff both the consult service and the Bridge Clinic, providing  
151 continuity of care to patients leaving VUH. Staff include internal medicine, psychiatry, pain-  
152 anesthesia, nursing, social work and a recovery coach. A patient discharged from VUH who is  
153 deemed appropriate for the Bridge Clinic is written a bridge script for buprenorphine MAT. Upon  
154 discharge and between Bridge Clinic visits, the use of VUMC preferred communications  
155 (telephone, text, email) outreach by case management is implemented; telephone outreach may  
156 improve outcomes similarly to face-to-face contact among addicted patients.<sup>2</sup>

157  
158 The Bridge Clinic was designed and implemented based on work completed at MGH, Boston  
159 Medical Center, Yale and UAB. The intent is to obviate the challenge that patients being  
160 considered for MAT are often not discharged until an outpatient provider willing to accept the  
161 patient has been identified, resulting in delays to discharge. By serving as a bridging provider,  
162 any delay in discharge is avoided. Moreover, the subset of patients requiring IV antibiotic  
163 therapy are often admitted for a full six-week course of treatment unless a skilled nursing facility  
164 is available, also at considerable expense to the healthcare system. For patients meeting low  
165 risk criteria, the multi-specialty Bridge Clinic is available to manage the antibiotic therapy as an  
166 outpatient. This provides further opportunities for the Bridge Clinic to broadly impact the hospital  
167 bed days dedicated to caring for this patient population while simultaneously providing access to  
168 dedicated care. While implemented clinically based on available evidence, the effectiveness of  
169 this care model in improving patient outcomes while reducing time in hospital has yet to be  
170 quantified in situ.

171

172

### 173 3. Rationale and Specific Aims

174

175 In order to rigorously evaluate the impact of the Bridge Clinic on improving care for patients with  
176 OUD, a randomized controlled trial is needed. Evidence generated in this way will support either  
177 the sustained implementation of the Bridge Clinic with scale up to meet demand, or sufficient  
178 evidence will accumulate to indicate the expected impact is not achieved and alternative  
179 approaches are needed to improve the system of care for OUD patients being considered for  
180 MAT. Given the overarching goal of evaluating the Bridge Clinic as it is operating, the specific  
181 aims of this study are to:

182

- 183 • Aim 1: To determine whether referral to the Bridge Clinic reduces overall index  
184 hospital length of stay when compared to direct referral to a long-term outpatient  
185 addiction provider for patients with active opioid use disorder (OUD) being  
186 considered for medications-for-addiction treatment (MAT).
- 187 • Aim 2: To evaluate the effects of the same intervention in the same population on  
188 secondary outcomes including costs, care-linkage, readmission rates, self-reported  
189 buprenorphine or naltrexone fills, rate of known recurrent opiate use, and measures  
190 of overall quality of life.
- 191 • Aim 3: Evaluate fidelity outcomes including Bridge Clinic acceptance and  
192 attendance rates among those referred to Bridge Clinic and reasons why patients  
193 were not considered to eligible for inclusion.
- 194 • Aim 4: Among the subgroup of patients with an infection for which a course of IV  
195 antibiotics is required, additionally evaluate whether access to the Bridge Clinic  
196 facilitates outpatient management of the antibiotic therapy, with consequent  
197 improvement in clinical (infection and mortality) and resource (inpatient days, time to  
198 discharge following a negative blood culture) outcomes.

199

200 To complete these aims, patients admitted to VUH with OUD and being considered for MAT,  
201 who have not previously utilized Bridge Clinic, will be enrolled in a pragmatic, single-center,  
202 randomized, controlled trial comparing referral to Bridge Clinic versus no referral to usual care in  
203 the community. Randomization ratio will be set to ensure the Bridge Clinic is functioning at  
204 capacity and the remaining patients will serve as the control. For example, if there is an average  
205 of five available slots for new referrals to the Bridge Clinic in a week, and there is an average of  
206 20 eligible patient discharges in a week, the randomization ration will be set as 1:3.

207

208 If the Bridge Clinic is successful in bridging buprenorphine-naloxone use (as well as IM  
 209 naltrexone in some cases) and linking to additional care, it is expected to decrease the overall  
 210 length of stay of patients with OUD who are initiating buprenorphine-naloxone therapy. This  
 211 reduction in length of stay for these patients will reduce costs and increases bed availability for  
 212 other patients while simultaneously providing these patients with the care they need.

#### 213 214 215 **4. Inclusion/Exclusion Criteria**

##### 216 217 Inclusion Criteria:

- 218 • Inpatients at VUH with active OUD being considered for MAT who have not
- 219 previously utilized Bridge Clinic
- 220 • Patient accepting a transitional prescription for buprenorphine-naloxone or IM
- 221 naltrexone whose outpatient plans are not fixed

##### 222 223 Exclusion Criteria:

- 224 • Deemed ineligible for referral to outpatient Bridge Clinic by the ACT (examples
- 225 include by are not limited to patients with severe, active co-occurring psychiatric
- 226 disorders requiring a higher level of psychiatric care or patients for whom methadone
- 227 maintenance is deemed the best choice of MAT).
- 228 • Patients previously randomized in this study.
- 229 • Patients previously utilized Bridge Clinic

#### 230 231 232 **5. Enrollment/Randomization**

233  
234 The Addiction Consult Team (ACT) will be notified of potentially eligible patients via an EPIC  
 235 consult order or referral from the general or homeless psychiatry service. Those patients for  
 236 whom an order for an addiction medicine consultation is placed will be evaluated by the ACT for  
 237 MAT. If the ACT considers MAT to be clinically appropriate, the patient does not have set plans  
 238 for outpatient care, and the patient has not been previously randomized in this study, they will  
 239 be enrolled and randomized. All other patients will be treated with usual care without availability  
 240 of referral to the Bridge Clinic.

241  
242 Screening information from enrolled patients will be entered into REDCap. For patients meeting  
 243 objective criteria but whom the ACT determine ineligible for MAT, the reason for not enrolling  
 244 them will be collected.

245  
246 Once eligibility is confirmed, the patient will be randomized to being offered referral to the Bridge  
 247 Clinic or not, as described below. Randomization will occur at the individual patient level.  
 248 Randomization ratio will start at 1:1 and will be updated as necessary, but no more frequently  
 249 than bi-weekly, to maintain the Bridge Clinic at capacity.

#### 250 251 252 **6. Study Procedures**

253  
254 An enrolled patient will receive a referral to social work for “outpatient MAT”. The ACT social  
 255 worker will approach the patients with resources for outpatient MAT determined by  
 256 randomization (though the social worker can escalate patients in either condition to a higher  
 257 level of care as appropriate after randomization). All patients will be offered usual information  
 258 about outpatient MAT. Patients randomized to be eligible for referral to the Bridge Clinic will  
 259 additionally receive information about the Bridge Clinic and this will be offered as an option

260 during discussion of the plan for MAT. Patients who are randomized to not being offered a  
 261 Bridge Clinic referral will not receive information about the Bridge Clinic and the Bridge Clinic  
 262 will not be offered as an option.

263  
 264 Subsequent to comparator group assignment, patients will be followed to measure outcomes.  
 265 Data will be captured from the medical record, financial systems, state-mandated reporting  
 266 systems, and from other standard of care documentation. Due to complications with the social  
 267 deprivation index (ADI) data within the RD, these associated variables will be obtained from the  
 268 Neighborhood Atlas (<https://www.neighborhoodatlas.medicine.wisc.edu/>). The data elements to  
 269 be collected include the following:

270  
 271 Baseline demographics collected at time of enrollment

- 272 • Age
- 273 • Gender
- 274 • Race
- 275 • Ethnicity
- 276 • SES indicators (e.g., ADI)

277  
 278 Primary Endpoint

- 279 • Overall index hospital length of stay

280  
 281 Additional Endpoints collected for 16 weeks following randomization

- 282 • Costs of care (total costs, and costs for each admission and care  
 283 resource used (e.g. Bridge Clinic))
- 284 • Linkage to MAT provider (attending at least one visit with a MAT  
 285 provider)
- 286 • Self-reported buprenorphine-naloxone (or naltrexone) prescriptions filled
- 287 • Readmission
- 288 • ED visits
- 289 • Hospital and ED free days
- 290 • Recurrent opiate use
- 291 • Overall quality of life as measured by the Schwartz Outcome Scale-10  
 292 (SOS10)
- 293 • Overdose
- 294 • Death
- 295 • Intervention Contamination (Bridge Clinic to community care or vice-  
 296 versa)

297  
 298 Additional Endpoints for patients with infection suitable for outpatient management, collected for  
 299 16 weeks following randomization

- 300 • New, persistent, or recurrent infection (as defined by a positive culture  
 301 and/or change in antibiotic regimen)
- 302 • Completion of antibiotic therapy
- 303 • Days from negative blood culture to first hospital discharge

304  
 305 Implementation Measurements

- 306 • Acceptance of Bridge Clinic as a bridging provider
- 307 • Reasons for ineligibility

308  
 309 Data will be abstracted from the EMR, REDCap and the Research Derivative (RD). Due to  
 310 complications with the area deprivation index (ADI) data within the RD, these associated  
 311 variables will be obtained from the Neighborhood Atlas

312 (<https://www.neighborhoodatlas.medicine.wisc.edu/>). The Research Derivative is a database of  
313 clinical and related data derived from the Medical Center's clinical systems and restructured for  
314 research. Data is repurposed from VU's enterprise data warehouse, which includes data from  
315 StarPanel, VPIMS, and ORMIS (Operating Room Management Information System), EPIC,  
316 Medipac, and HEO among others. The medical record number and other person identifiers are  
317 preserved within the database. Data types include reimbursement codes, clinical notes and  
318 documentation, nursing records, medication data, laboratory data, encounter and visit data,  
319 among others. Output may include structured data points, such as ICD 9 codes or encounter  
320 dates, semi-structured data such as laboratory tests and results, or unstructured data such as  
321 physician progress reports. The database is maintained by the Office of Research Informatics  
322 under the direction of Paul Harris, Ph.D.

323  
324

## 325 7. Risks and Benefits

326

327 The risks associated with this study are limited to those associated with protection of private  
328 health information; beyond the randomization, the interaction with human subjects is limited to  
329 collection of data from existing records. Allocation made by randomization is between two usual  
330 approaches of care: i) inpatient MAT (buprenorphine or naltrexone) or appropriate alternative  
331 until a long-term outpatient MAT provider accepts the patient (sometimes after SNF stay), or ii)  
332 inpatient MAT (buprenorphine or naltrexone) or appropriate alternative with referral to the Bridge  
333 Clinic, who will maintain the patient's care until a long-term outpatient MAT provider accepts the  
334 patient. Currently, the Bridge Clinic can only accept a limited number of patients and so the  
335 choice of approach is based on availability. By randomizing the availability of the Bridge Clinic, it  
336 is possible to derive knowledge of the impact of the clinic on patient outcomes that would  
337 otherwise not be discoverable without bias. The results of this study will help understand the  
338 impact of the Bridge Clinic and be used as data for potentially expanding the resources and  
339 availability of the Bridge Clinic to additional patients or refining services to improve patient  
340 care.

341

342 We expect that patients randomized to being eligible for Bridge Clinic services will experience  
343 decreased overall length of stay. We also expect overall reduced costs. The resource savings  
344 benefit not only the study participant, but this approach will open up hospital days/beds for other  
345 patients.

346

347 Risks associated with the collection of personal health information (PHI) will be mitigated by  
348 taking all reasonable efforts to keep the information private and confidential. The minimum  
349 amount of health information necessary for study conduct will be abstracted from the medical  
350 record. PHI will be entered into REDCap, which is a secure platform for maintaining research  
351 data. Identifiers will be needed to prevent duplicate enrollments and to track patients through  
352 the health system, but user level access will be set up to limit access to any identifiers only to  
353 those study personnel who need this access. Analysis datasets may be stored on secure  
354 servers but will not include direct identifiers. Direct identifiers will not be included in datasets  
355 unless absolutely necessary.

356

357

## 358 8. Reporting of Adverse Events or Unanticipated Problems Involving Risk to 359 Participants or Others

360

361 Participating in the study does not add risk related to treatment. The Bridge Clinic is operational  
362 and provides usual clinical care to those patients fitting within its capacity. All other processes  
363 for linking patients to outpatient MAT are well established. Events associated with MAT or other



364 care of patients are clinical and not associated with the research. Risks to patients from  
365 participating in the study are limited to the collection of PHI. We recognize there may be  
366 adverse events related to loss of privacy. These will be reported according to appropriate  
367 timelines. The Principal Investigator will be responsible for overseeing the study on a daily  
368 basis.

369  
370

## 371 9. Study Withdrawal/Discontinuation

372

373 Because this study involves only observational data collection after randomization to Bridge  
374 Clinic or no Bridge Clinic availability, there are no plans to withdraw participants or discontinue  
375 them in the study. Implementation outcomes, such as uptake of Bridge Clinic referrals, are  
376 important to gather and will be included. If a patient requests that their records not be included  
377 in any research, they will not be included and all data collected for this study will be removed  
378 from the dataset. However, if analyses have already been completed and reported at the time of  
379 the request, we will retain a copy of the data in a de-identified manner to ensure rigor and  
380 reproducibility of the research.

381

382

## 383 10. Statistical Considerations

384

### 385 Statistical Analysis Plan:

386 Initially, we will characterize participants overall and grouped by study arm using descriptive  
387 statistics (e.g. means with standard deviations, medians with interquartile range, and counts  
388 with percentages, as appropriate). Data may also be described graphically. The primary  
389 analysis will compare length of index hospital stay between those offered referral to the Bridge  
390 Clinic and those not offered referral to the Bridge Clinic on an intent-to-treat basis. We will  
391 compare length of stay using a generalized linear model with group assignment as the primary  
392 predictor variable, with adjustment for important covariates. We expect to model the outcome as  
393 a continuous outcome. We may choose to use a proportional hazards model or a gamma GLM  
394 with a log-link function if the data are substantially skewed; we do not expect this based on our  
395 experience with length of stay in this patient cohort. For secondary outcomes, costs will be  
396 similarly modeled. Binary outcomes will be modeled using logistic regression, Quality of life  
397 outcomes will be modeled using a proportional odds regression. Additional analyses that we  
398 expect to perform include 'per protocol' comparisons between study groups and characterization  
399 of implementation measures.

400

### 401 Power and Sample Size Considerations:

402 We estimate 700 patients per year, or about 14 patients per week, will be eligible to participate  
403 in this study, with a capacity for approximately 3-4 new patients per week to be seen at the  
404 Bridge Clinic. We expect approximately 2/3 of patients referred to the Bridge Clinic to make their  
405 first appointment. Therefore, we will randomize patients at a rate of 1:1 to Bridge Clinic versus  
406 usual care. The randomization may be adapted if eligibility and follow up rates are different to  
407 expected. The mean length of stay for patients is currently 15 days, ranging from 3-42 and a  
408 standard deviation of about 15 days. With 700 patients in a year, allocated 1:1, we will have  
409 about 80% power to detect a 3-day reduction in length of stay. This does assume a reduced  
410 standard deviation of 10 days. If the standard deviation remains at about 15 days, the difference  
411 detectable with 80% power is 3.5 days.

412

### 413 Interim Analysis

414 Because of the disruption caused by COVID-19 and lower than expected enrollment, midway  
415 through the recruitment period we decided to re-estimate the sample size based on the

416 experience of patients. Blinded to allocation, we estimated the distribution of length of stay for  
417 all enrolled patients. We found the mean length of stay was shorter, at 9 days, with a standard  
418 deviation of 11. However, the distribution was decidedly right skewed. Therefore, we log  
419 transformed the length of stay variable for deciding on the final sample size. The mean length of  
420 stay was  $\ln(5.5)$  days with a standard deviation of  $\ln(2.7)$  days. **Assuming that a reduction in**  
421 **length of stay of 1.5 days is meaningful and the observed common standard deviation is**  
422 **a good estimate, about 168 patients per group, or 336 patients total, would be required to**  
423 **have 80% power to detect a difference.**

424

425

## 426 11. Privacy/Confidentiality Issues

427

428 At no time during the course of this study, its analysis, or its publication will patient identities be  
429 revealed. The minimum necessary data will be collected and data containing patient or provider  
430 identifiers will only be obtained as required to complete the research. Data will be unlinked from  
431 identifiers, using a unique key to facilitate linkage when needed. Data will be collected into a  
432 password-protected, secure, web-based application for managing research data (REDCap). All  
433 patients will be assigned a unique study number for use in the computerized database. At the  
434 time of publication all identifiers will be removed from the archival dataset.

435

436

## 437 12. Follow-up and Record Retention

438

439 The initial study is anticipated to progress from initiation to completion in about 12 months. For  
440 each participant, the study will commence at enrollment and last until 16 weeks from  
441 randomization. Patient clinical outcomes will be collected. Identified data in the secure database  
442 will be stored consistent with record retention requirements, typically 5 years from completion of  
443 the research. De-identified dataset will be maintained for secondary analyses and to support the  
444 reproducibility of reports.

445



Statistical analysis plan for Evaluating the Impact of the Bridge Clinic in Patients with Opioid Use Disorder  
PI: Marcovitz, DE

**Evaluating the Impact of the Bridge Clinic in Patients with Opioid Use Disorder**

**Statistical Analysis Plan**

**Version 1.0**

**April 11, 2022**



---

Christopher J. Lindsell, PhD

---

April 11, 2022

Date

Statistical analysis plan for Evaluating the Impact of the Bridge Clinic in Patients with Opioid Use Disorder  
PI: Marcovitz, DE

### **Introduction**

To improve care for patients with opioid use disorder (OUD), Vanderbilt has implemented an Addiction Consult Team (ACT) and a Bridge Clinic. The primary purpose of the Bridge Clinic is to facilitate discharge for inpatients who are being considered for medications for OUD (MOUD). Specifically, the Bridge Clinic provides patients with temporary access to treatment at an outpatient clinic while they are waiting to be accepted into a long-term clinic. This document describes the statistical analysis plan for a pragmatic, single center, randomized, controlled trial designed to evaluate the impact of the Bridge Clinic on improving care for patients with active OUD. This document has been prepared prior to final data collection and unblinding. Because inpatient providers may delay discharge for patients with OUD who lack a source of outpatient care for MOUD, it is hypothesized that OUD patients referred to the Bridge Clinic will have a decreased overall length of stay, will follow up with their Bridge Clinic provider, and will have a reduction in overall costs for care.

### **Population and design considerations**

#### *Study Population:*

Inpatients at VUH with OUD being considered for MOUD who have not used the Bridge Clinic before and who do not have a fixed outpatient plan are considered potentially eligible for this trial. If the ACT considers MOUD is clinically appropriate for the patient, the patient does not have plans for outpatient care, and the patient has not been enrolled in this study previously, they are enrolled, randomized, and offered a referral to either Bridge Clinic or treatment as usual (TAU) depending on randomization.

#### *Study Design:*

This study is designed as a pragmatic, single center, randomized, controlled trial comparing clinical outcomes between patients assigned to receive a referral to the Bridge Clinic and patients assigned to TAU.

#### *Randomization:*

Randomization occurs at the individual patient level. The Bridge Clinic can only accept a limited number of patients, so eligible patients will be randomized in a ratio so that the Bridge Clinic is at capacity. To start, the ratio will be 1:1, and can be updated as often as bi-weekly to maintain the Bridge Clinic capacity. There has been no indication or need to change the ratio during the study.

#### *Sample Size Considerations:*

We estimated about 700 patients per year would be eligible for this study, with a capacity for about 3-4 new patients a week to be seen at the Bridge Clinic. We expected about 2/3 of patients referred to the Bridge Clinic to make their first appointment. The mean length of stay was 15 days with a standard deviation of about 15 days. Assuming a reduced standard deviation of 10 days, with 700 patients a year and a 1:1 randomization ratio, we would have 80% power to detect a 3-day reduction in length of stay. If the standard deviation remains at 15 days, we would have 80% power to detect a 3.5-day reduction in length of stay. Due to COVID-19, enrollment was lower than expected and hospital inpatient experiences differed from historical data. Midway through the recruitment period, the overall, ungrouped distribution of length of stay was re-estimated based on participant experience. Based on the revised assumptions, to detect a 1.5-day

Statistical analysis plan for Evaluating the Impact of the Bridge Clinic in Patients with Opioid Use Disorder  
PI: Marcovitz, DE

reduction in length of stay and assuming the observed common standard deviation is a good estimate, about 336 patients (168 per group) is needed to have 80% power.

### **Interventions**

Inpatients with OUD who are deemed eligible for this trial are enrolled and randomized. The patients are randomized to one of two treatment arms:

- a) Direct referral to a long-term outpatient addiction provider (TAU)
- b) Referral to Bridge Clinic for temporary care while a long-term outpatient addiction provider is identified (intervention)

### **Endpoints**

#### *Primary Endpoint*

The primary endpoint is the overall index hospital length of stay. The index length of stay is defined as the time between the admission and time of discharge during the inpatient visit when the participant is identified as being eligible for the study.

#### *Secondary Endpoints*

Multiple secondary endpoints are prespecified for this trial. Secondary endpoints are collected for 16 weeks following randomization:

- a) Overall quality of life as measured by the Schwartz Outcome Scale-10 (SOS10). The SOS10 has ten questions scored on a 0 (never) to 6 (all or nearly all of the time) scale. A total score is computed as the sum across the 10 questions. If two questions are missing, a mean score can be imputed for the missing values to generate a total score. No further imputation will be used for this score. This is self-reported and captured at the 16-week follow-up call.
- b) Linkage to MOUD provider, defined as attending at least one visit with a MOUD provider after discharge, assessed by self-report at 16-week follow-up call.
- c) Self-reported buprenorphine-naloxone (or naltrexone) prescriptions filled (number filled) at the 16-week follow-up call.
- d) Any recurrent opioid use reported at the 16-week phone call follow-up.
- e) Number of recurrent opioid uses reported at the 16-week phone call follow-up.
- f) Number of ED visits or readmissions to VUH 16 weeks post discharge identified in the electronic medical record.
- g) Hospital and emergency department free days
  - a. Hospital free days will be calculated as a count of whole days during the 16 weeks the subject is not in the hospital. If the subject dies before the end of 16 weeks, hospital free days will be equal to -1.
  - b. Hospital and emergency department free days will be calculated as a count of whole days during the 16 weeks the subject is not in the emergency department or in the hospital. If the subject dies before the end of 16 weeks, emergency free days will be equal to -1.
- h) Any overdose reported at the 16-week phone call follow-up.
- i) Death in hospital or documented at the 16 week follow up or in the medical record.
- j) Costs of care, defined as total costs for all care episodes at VUMC 16 weeks post discharge.

Statistical analysis plan for Evaluating the Impact of the Bridge Clinic in Patients with Opioid Use Disorder  
PI: Marcovitz, DE

### *Exploratory Endpoints*

Exploratory endpoints have been specified for patients with infection suitable for outpatient antibiotic therapy (OPAT) management. These endpoints are collected for 16 weeks following randomization by review of VUMC's electronic medical record:

- a) New, persistent, or recurrent infection: defined by positive culture and/or change in antibiotic regimen
- b) Completion of antibiotic therapy
- c) Days from negative blood culture (i.e., blood draw date) to first hospital discharge

### *Implementation Endpoints*

- a) Acceptance of Bridge Clinic as a bridging provider, defined by being physically checked in for at least 1 visit with the Bridge Clinic within 16 weeks of follow up.
- b) Reasons for ineligibility among participants screened, specifically:
  - Absence of a qualifying OUD
  - Previously linked with a MOUD provider either prior to or during the current visit?
  - ACT determines the participant does not qualify

### *Fidelity Endpoint*

- a) Cross-over, defined as when a patient randomized to usual care is offered the Bridge Clinic, or when a patient is randomized to Bridge Clinic but is only offered usual care, at the time of discharge from the inpatient stay.

### **Analysis dataset**

The analysis for the trial will use an intent-to-treat approach to answer the effectiveness question posed. That is, participants will be evaluated by treatment group as assigned regardless of what was delivered. All eligible participants will be included. There is no plan to restrict the analysis to a per protocol set.

### **Statistical Approach**

Our initial analysis will be descriptive in nature, summarizing information that characterizes the cohort and the outcomes. Then, we will proceed with inferential analysis to answer the main study question. Then, we will compare the secondary endpoints between study groups.

### *Descriptive Analysis*

To characterize the study sample, baseline demographic and clinical data will be described overall and by group. Categorical variables will be described using frequencies and proportions, and continuous variables will be described using means and standard deviations, as well as medians and interquartile ranges. Missingness will be reported for each variable. Graphical summaries using box plots, violin plots, and/or histograms may be used to describe the data graphically. At a minimum, the following variables will be described at time of enrollment:

- Age (years)
- Gender (male, female, unknown)
- Race (African American, Asian/Pacific Islander, Caucasian, Multiple, Native American, Other, Unknown)
- Ethnicity (Hispanic, Non-Hispanic, Unknown)
- Census tract area deprivation index

Statistical analysis plan for Evaluating the Impact of the Bridge Clinic in Patients with Opioid Use Disorder  
PI: Marcovitz, DE

We will describe all of the outcome variables overall and grouped by study arm using the same approach as for the demographic data. Summary statistics and graphical representations may be displayed, and missingness will be reported for each variable.

No statistical comparisons between groups will be done for this descriptive analysis.

#### *Main Analysis*

The primary outcome variable (hospital index length of stay) will be compared between groups using an adjusted generalized linear model. Since the data are positive and may be skewed, like a gamma distribution, we may use a negative inverse link function, a proportional odds model, or transform the data.

In this analysis, group assignment is the main predictor variable. For drawing conclusions about the effect of the Bridge clinic, a critical p-value of 0.05 for the effect of treatment group assignment on the primary outcome will be used. The model will be adjusted for age, race, ethnicity, and area deprivation index. The influence of continuous variables will be assessed using restricted cubic splines with a minimum of three knots. We do not expect missingness in our primary outcome. If there are missing covariates, cases will not be excluded; we will use multiple imputation with predictive mean matching for missingness in adjusting covariates.

Secondary and implementation outcomes will be compared between study groups using adjusted generalized linear models, just as for the primary endpoint. Binary endpoints will use a logit link function. For counts, such as number of medication refills, either a zero-inflated Poisson or a negative binomial model will be fit.

Exploratory outcomes for OPAT patients will not be compared between study groups but will be reported by study group.

There may be missingness in secondary or implementation outcomes. If there are missing outcomes, these may be imputed if they occur in less than 5% of cases. Otherwise, the cohort for which the outcome is available will be described, along with the results of the model evaluating treatment effects in this cohort. All model results will be summarized with point estimates and 95% confidence intervals (CIs), which will be emphasized over p-values when reporting the results for secondary and implementation outcomes. No adjustments for multiplicity will be made.

#### *Differential treatment effects*

To determine whether effects of treatment on the primary endpoint depends on any of the baseline characteristics, we will test the interaction between the baseline characteristics and treatment effect in the regression model. If evidence of an interaction is observed using a threshold of  $p < 0.2$ , we will proceed to subgroup analyses. For categorical variables, endpoints will be compared between within categories. For continuous variables, we will display the partial effects plots showing how treatment effects change with the putative subgrouping variable.



Statistical analysis plan for Evaluating the Impact of the Bridge Clinic in Patients with Opioid Use Disorder  
PI: Marcovitz, DE

**Summary**

The results of this study will help to determine whether the Bridge Clinic is effective at improving patient outcomes. The analysis approach we describe is selected based on the trial's pragmatic nature and the intent to understand the effectiveness of Bridge Clinic when compared to TAU.

## Evaluating the Impact of the Bridge Clinic in Patients with Opioid Use Disorder

### Statistical Analysis Plan Addendum

March 1, 2023

#### Endpoints

##### *Exploratory Endpoints*

Post hoc, it was determined that there is uncertainty in specifying the timing of a consult with the inpatient psychiatric service. Therefore, an additional exploratory length of stay endpoint was defined using a consistent start point. This hospital length of stay variable is defined as the time between the time of randomization and the time of discharge during the index inpatient visit. This endpoint is incorporated into the statistical plan prior as an exploratory endpoint.

  
\_\_\_\_\_  
Christopher J. Lindsell, PhD

3/1/2023  
Date

454 **eSupp3 – Statistical Analysis Report**455 **Evaluating the Impact of the Bridge Clinic in Patients with Opioid**  
456 **Use Disorder**

457 Cassie Hennessy

458 2023-06-20

459 **Table of Contents**

|     |                                                                      |    |
|-----|----------------------------------------------------------------------|----|
| 460 | Project Summary.....                                                 | 22 |
| 461 | Data Summary.....                                                    | 23 |
| 462 | Table 1: Demographics by treatment group and overall.....            | 23 |
| 463 | Figure 1: Continuous Variable Distributions.....                     | 24 |
| 464 | Outcomes.....                                                        | 25 |
| 465 | Table 2: Primary outcome: overall index hospital length of stay..... | 25 |
| 466 | Figure 2: Index hospital length of stay, overall and by group.....   | 25 |
| 467 | Table 3: Secondary outcomes.....                                     | 26 |
| 468 | Figure 3a: Number of Readmissions.....                               | 29 |
| 469 | Figure 3b: Number of ED Visits.....                                  | 29 |
| 470 | Figure 3c: Number of Readmissions or ED Visits.....                  | 29 |
| 471 | Figure 4: Cost of care.....                                          | 30 |
| 472 | Figure 5: Quality of life.....                                       | 30 |
| 473 | Table 4: Exploratory Outcomes.....                                   | 31 |
| 474 | Table 5a: Implementation Outcome - Acceptance of Bridge Clinic.....  | 32 |
| 475 | Table 5b: Implementation Outcome - Reasons for ineligibility.....    | 32 |
| 476 | Table 6: Fidelity Outcome.....                                       | 33 |
| 477 | Primary Analysis.....                                                | 34 |
| 478 | Unadjusted Primary Analysis.....                                     | 34 |
| 479 | Adjusted Primary Analysis.....                                       | 34 |
| 480 | Test differential treatment effects.....                             | 36 |
| 481 | Secondary Analysis.....                                              | 38 |
| 482 | Number of readmissions.....                                          | 39 |
| 483 | Unadjusted - Proportional odds model.....                            | 39 |
| 484 | Adjusted - Proportional odds model.....                              | 39 |

|     |                                            |    |
|-----|--------------------------------------------|----|
| 485 | Number of ED visits.....                   | 41 |
| 486 | Unadjusted - Proportional odds model ..... | 41 |
| 487 | Adjusted - Proportional odds model.....    | 41 |
| 488 | Number of readmissions or ED visits .....  | 43 |
| 489 | Unadjusted - Proportional odds model ..... | 43 |
| 490 | Adjusted - Proportional Odds Model.....    | 43 |
| 491 | Recurrent opioid use.....                  | 45 |
| 492 | Unadjusted.....                            | 45 |
| 493 | Adjusted .....                             | 45 |
| 494 | Opioid use in last 30 days .....           | 47 |
| 495 | Unadjusted.....                            | 47 |
| 496 | Adjusted .....                             | 47 |
| 497 | Total cost of care.....                    | 48 |
| 498 | Unadjusted.....                            | 48 |
| 499 | Adjusted .....                             | 49 |
| 500 | Linkage to MOUD provider .....             | 50 |
| 501 | Unadjusted.....                            | 50 |
| 502 | Adjusted .....                             | 51 |
| 503 | Quality of life.....                       | 53 |
| 504 | Unadjusted.....                            | 53 |
| 505 | Adjusted .....                             | 53 |
| 506 | Overdose.....                              | 55 |
| 507 | Unadjusted.....                            | 55 |
| 508 | Adjusted .....                             | 55 |
| 509 | Death.....                                 | 56 |
| 510 | Unadjusted.....                            | 56 |
| 511 | Adjusted .....                             | 57 |
| 512 | Hospital free days .....                   | 58 |
| 513 | Unadjusted.....                            | 58 |
| 514 | Adjusted .....                             | 59 |
| 515 | Hospital and ED free days .....            | 60 |
| 516 | Unadjusted.....                            | 60 |
| 517 | Adjusted .....                             | 61 |

|     |                                                                                           |    |
|-----|-------------------------------------------------------------------------------------------|----|
| 518 | Number of buprenorphine refills.....                                                      | 63 |
| 519 | Unadjusted.....                                                                           | 63 |
| 520 | Adjusted .....                                                                            | 63 |
| 521 | Implementation Outcome Analysis .....                                                     | 65 |
| 522 | Acceptance of Bridge Clinic as a bridging provider .....                                  | 65 |
| 523 | Unadjusted.....                                                                           | 65 |
| 524 | Adjusted .....                                                                            | 65 |
| 525 | Post Hoc Analyses .....                                                                   | 67 |
| 526 | Binary logistic regression for readmissions, ED visits, and readmission or ED visit ..... | 67 |
| 527 | Readmission: yes/no within 16 week follow up .....                                        | 67 |
| 528 | ED visits: yes/no within 16 week follow up .....                                          | 68 |
| 529 | Readmission or ED visit: yes/no within 16 week follow up .....                            | 70 |
| 530 | Exploratory outcome: Index hospital length of stay from time of randomization.....        | 72 |
| 531 | Table 7: LOS from time of randomization.....                                              | 72 |
| 532 | Figure 6: Index hospital length of stay from randomization, overall and by group.....     | 72 |
| 533 | Analysis .....                                                                            | 72 |
| 534 | Propensity Score Analysis .....                                                           | 75 |
| 535 | Linkage to MOUD Provider .....                                                            | 76 |
| 536 | Recurrent opioid use.....                                                                 | 78 |
| 537 | Opioid use in last 30 days .....                                                          | 80 |
| 538 | Overdose.....                                                                             | 82 |
| 539 | Number of buprenorphine refills.....                                                      | 84 |
| 540 | Quality of Life .....                                                                     | 86 |
| 541 |                                                                                           |    |
| 542 |                                                                                           |    |

## 543 Project Summary

544 A pragmatic, single center, randomized, controlled trial designed to evaluate the impact of the  
545 Bridge Clinic on improving care for patients with active opioid use disorder (OUD).

- 546 • The Bridge Clinic provides patients with temporary access to treatment at an outpatient  
547 clinic while they are waiting to be accepted into a long-term clinic

548 **Hypothesis:** Because inpatient providers may delay discharge for patients with OUD who lack a  
549 source of outpatient care for MOUD, it is hypothesized that OUD patients referred to the Bridge  
550 Clinic will have a decreased overall length of stay, will follow up with their Bridge Clinic  
551 provider, and will have a reduction in overall costs for care.

### 552 Inclusion:

- 553 • Adults (age  $\geq$  18 years old)
- 554 • Inpatients at VUH
- 555 • Active OUD
- 556 • Being considered for MAT (MOUD)
- 557 • No fixed outpatient plan
- 558 • ACT considers MOUD clinically appropriate for the patient

### 559 Exclusion:

- 560 • Ineligible for referral to outpatient Bridge Clinic by ACT
- 561 • Previously randomized in the study
- 562 • Previously used Bridge Clinic

### 563 Interventions:

- 564 • Direct referral to a long-term outpatient addiction provider (Usual Care)
- 565 • Referral to Bridge Clinic to temporary care while a long-term outpatient addiction  
566 provider is identified

### 567 Calculate quartiles for ADI, using National Percentile (0-100)

- 568 • Quartile 1: [0,42)
- 569 • Quartile 2: [42,55)
- 570 • Quartile 3: [55,72)
- 571 • Quartile 4: [72,100]

572 40 subjects are allocated to specific quartiles, as determined by the study team

- 573 • 38 subjects allocated to Quartile 1
- 574 • 2 subjects allocated to Quartile 2

## 575 Data Summary

576 Table 1: Demographics by treatment group and overall

|                                    | Overall           | Bridge Clinic     | Usual Care        |
|------------------------------------|-------------------|-------------------|-------------------|
| N                                  | 335               | 167               | 168               |
| Age (mean (SD))                    | 39.8 (10.3)       | 40.4 (10.8)       | 39.1 (9.7)        |
| Age (median [IQR])                 | 38.0 [31.9, 45.7] | 38.7 [32.1, 47.0] | 37.9 [31.8, 44.5] |
| Sex                                |                   |                   |                   |
| Female                             | 141 (42.1)        | 72 (43.1)         | 69 (41.1)         |
| Male                               | 194 (57.9)        | 95 (56.9)         | 99 (58.9)         |
| Area Deprivation Index (Quartiles) |                   |                   |                   |
| Quartile 1                         | 112 (33.4)        | 55 (32.9)         | 57 (33.9)         |
| Quartile 2                         | 73 (21.8)         | 35 (21.0)         | 38 (22.6)         |
| Quartile 3                         | 71 (21.2)         | 35 (21.0)         | 36 (21.4)         |
| Quartile 4                         | 79 (23.6)         | 42 (25.1)         | 37 (22.0)         |
| Race                               |                   |                   |                   |
| White                              | 287 (85.7)        | 144 (86.2)        | 143 (85.1)        |
| Black or African American          | 36 (10.7)         | 16 ( 9.6)         | 20 (11.9)         |
| Other                              | 10 ( 3.0)         | 6 ( 3.6)          | 4 ( 2.4)          |
| Missing/Unknown                    | 2 ( 0.6)          | 1 ( 0.6)          | 1 ( 0.6)          |
| Ethnicity                          |                   |                   |                   |
| Hispanic/Latino                    | 12 ( 3.6)         | 6 ( 3.6)          | 6 ( 3.6)          |
| Non-Hispanic/Latino                | 320 (95.5)        | 161 (96.4)        | 159 (94.6)        |
| Missing/Unknown                    | 3 ( 0.9)          | 0 ( 0.0)          | 3 ( 1.8)          |

577 Figure 1: Continuous Variable Distributions

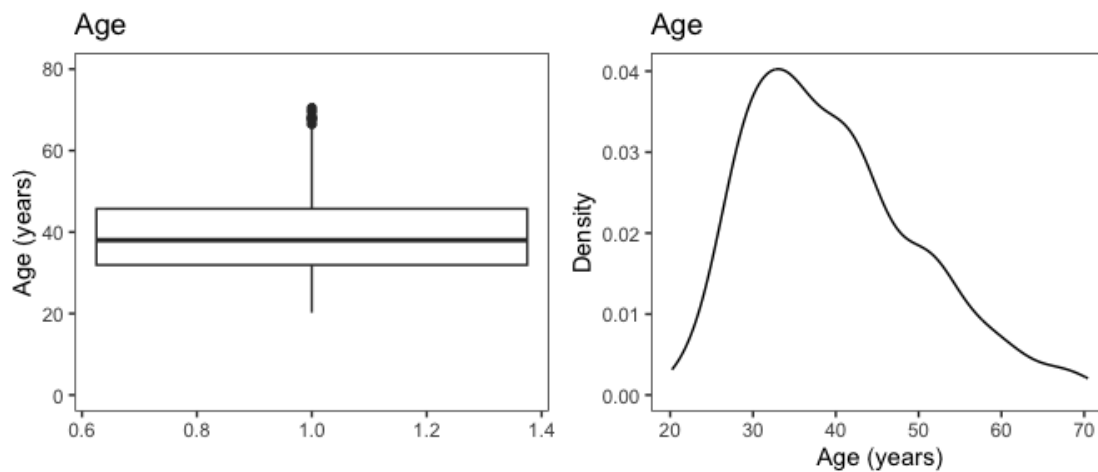

578

579



580 **Outcomes**581 **Table 2: Primary outcome: overall index hospital length of stay**

- 582 • The time between admission and time of discharge during the inpatient visit when the  
583 participant is identified as being eligible for the study

584

|                                       | Overall             | Bridge Clinic       | Usual Care          |
|---------------------------------------|---------------------|---------------------|---------------------|
| n                                     | 335                 | 167                 | 168                 |
| Length of stay (hours) (mean (SD))    | 223.6 (252.0)       | 215.0 (236.1)       | 232.1 (267.4)       |
| Length of stay (hours) (median [IQR]) | 139.1 [84.6, 258.0] | 141.7 [78.1, 276.1] | 136.2 [86.9, 256.7] |

585

586 **Figure 2: Index hospital length of stay, overall and by group**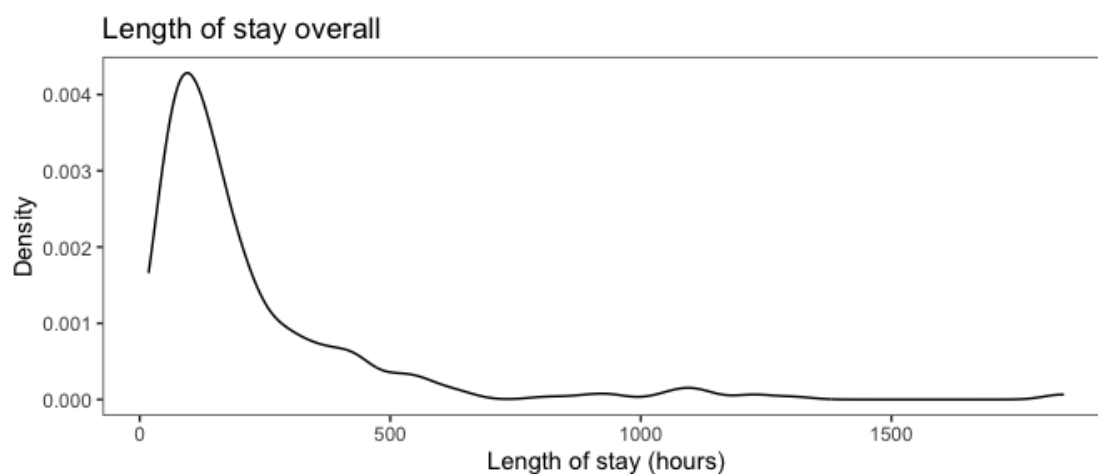

587

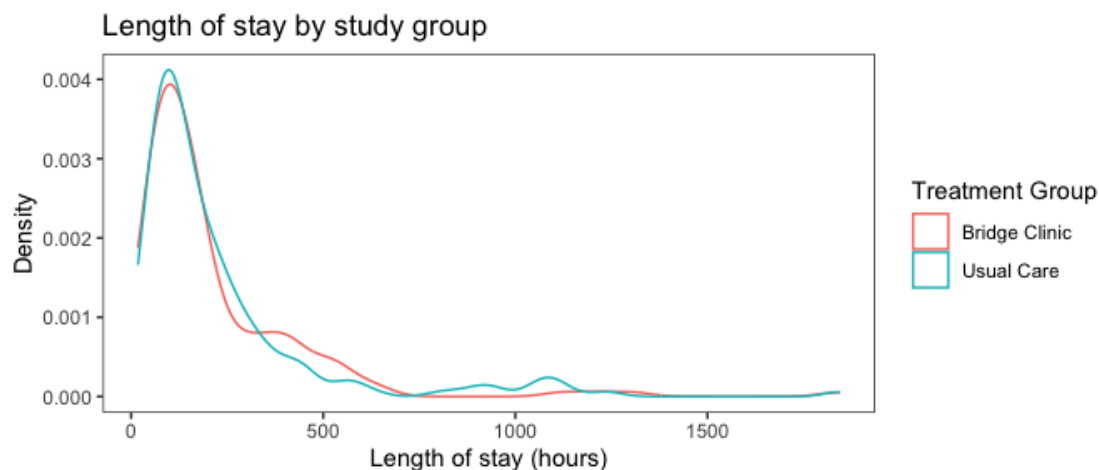

588

589 **Table 3: Secondary outcomes**

- 590 • Readmission: number of readmissions to VUH 16 weeks post discharge
- 591 • ED Visits: number of ED visits to VUH 16 weeks post discharge
- 592 • Readmission and ED visits: number of ED visits or readmissions to VUH 16 weeks post  
593 discharge
- 594 • Recurrent opioid use: yes/no; any recurrent opioid use within the 16 week follow up
- 595 • Opioid use in the last 30 days:
- 596 – No use, single use, multiple use
- 597 • Cost of care: total costs for all care episodes at VUMC 16 weeks post discharge
- 598 – Remove the patient encounters listed as 'NI'
- 599 – Sum up the Total Costs for each patient, across their encounters
- 600 • Linkage to MOUD provider: yes/no; attended at least one visit with a MOUD provider  
601 after discharge
- 602 • Quality of Life: Schwartz Outcome Scale-10
- 603 – Sum across the 10 questions
- 604 – If one or two questions are missing, the mean of the non-missing questions is  
605 used to impute the missing column
- 606 – If three or more questions are missing, the quality of life is missing
- 607 • Overdose: yes/no; within the 16 week follow up
- 608 • Death: yes/no; within the 16 week follow up
- 609 • Hospital free days and Hospital free & ED free days:
- 610 – Hospital free days will be calculated as a count of whole days during the 16  
611 weeks the subject is not in the hospital. If the subject dies before the end of 16  
612 weeks, hospital free days will be equal to -1.
- 613 – Hospital and emergency department free days will be calculated as a count of  
614 whole days during the 16 weeks the subject is not in the emergency department  
615 or in the hospital. If the subject dies before the end of 16 weeks, emergency free  
616 days will be equal to -1.
- 617 – Per SAP, admission and discharge date each count as 1 day in the hospital/ED so  
618 the calculated LOS should not be used for this
- 619 – Some patients have inpatient encounters listed that happened during their index  
620 hospital stay (i.e., were in the hospital for multiple days and had a surgery or lab  
621 after they were enrolled in the study). These should be filtered out to only  
622 include subsequent encounters 16 weeks after discharge from index stay.
- 623 – If a subject has no hospital or emergency room encounters and does not die  
624 within the 16 week follow up, hospital and hospital & ED frees are set to 112  
625 days (16 weeks)
- 626 • Self-reported buprenorphine-naloxone (or naltrexone) prescriptions filled (number  
627 filled) at the 16-week follow-up call

Overall

Bridge Clinic

Usual Care

|                                                    | Overall                    | Bridge Clinic               | Usual Care                 |
|----------------------------------------------------|----------------------------|-----------------------------|----------------------------|
| N                                                  | 335                        | 167                         | 168                        |
| Number of readmissions (median [IQR])              | 0.00 [0.00, 0.00]          | 0.00 [0.00, 1.00]           | 0.00 [0.00, 0.00]          |
| At least one readmission (%)                       |                            |                             |                            |
| Yes                                                | 70 (20.9)                  | 45 (26.9)                   | 25 (14.9)                  |
| No                                                 | 265 (79.1)                 | 122 (73.1)                  | 143 (85.1)                 |
| Number of ED visits (median [IQR])                 | 0.00 [0.00, 0.00]          | 0.00 [0.00, 0.00]           | 0.00 [0.00, 0.00]          |
| At least one ED visit (%)                          |                            |                             |                            |
| Yes                                                | 76 (22.7)                  | 40 (24.0)                   | 36 (21.4)                  |
| No                                                 | 259 (77.3)                 | 127 (76.0)                  | 132 (78.6)                 |
| Number of readmissions or ED visits (median [IQR]) | 0.00 [0.00, 1.00]          | 0.00 [0.00, 1.00]           | 0.00 [0.00, 1.00]          |
| At least one readmission or ED visit (%)           |                            |                             |                            |
| Yes                                                | 121 (36.1)                 | 69 (41.3)                   | 52 (31.0)                  |
| No                                                 | 214 (63.9)                 | 98 (58.7)                   | 116 (69.0)                 |
| Recurrent opioid use (%)                           |                            |                             |                            |
| Yes                                                | 38 (11.3)                  | 23 (13.8)                   | 15 (8.9)                   |
| No                                                 | 50 (14.9)                  | 33 (19.8)                   | 17 (10.1)                  |
| Missing                                            | 247 (73.7)                 | 111 (66.5)                  | 136 (81.0)                 |
| Opioid use in last 30 days (%)                     |                            |                             |                            |
| No use                                             | 4 (1.2)                    | 2 (1.2)                     | 2 (1.2)                    |
| Single use                                         | 4 (1.2)                    | 0 (0.0)                     | 4 (2.4)                    |
| Multiple use                                       | 24 (7.2)                   | 17 (10.2)                   | 7 (4.2)                    |
| Missing                                            | 303 (90.4)                 | 148 (88.6)                  | 155 (92.3)                 |
| Total cost of care (mean (SD))                     | 20052.86 (34970.10)        | 25066.64 (40311.33)         | 14740.26 (27379.09)        |
| Total cost of care (median [IQR])                  | 4926.93 [678.99, 22109.90] | 9481.93 [1478.28, 29376.14] | 1705.28 [360.16, 12146.33] |
| Missing                                            | 24 (7.2)                   | 7 (4.2)                     | 17 (10.1)                  |

|                                                            | Overall                 | Bridge Clinic           | Usual Care              |
|------------------------------------------------------------|-------------------------|-------------------------|-------------------------|
| Linkage to MOUD provider (%)                               |                         |                         |                         |
| Yes                                                        | 64 (19.1)               | 45 (26.9)               | 19 (11.3)               |
| No                                                         | 24 ( 7.2)               | 11 ( 6.6)               | 13 ( 7.7)               |
| Missing                                                    | 247 (73.7)              | 111 (66.5)              | 136 (81.0)              |
| Quality of Life (mean (SD))                                |                         |                         |                         |
|                                                            | 40.42 (16.44)           | 40.36 (17.75)           | 40.53 (14.21)           |
| Quality of Life (median [IQR])                             |                         |                         |                         |
|                                                            | 44.00 [29.50, 54.00]    | 47.00 [26.00, 53.75]    | 41.50 [32.50, 54.25]    |
| Missing                                                    | 249 (74.3)              | 113 (67.7)              | 136 (81.0)              |
| Overdose (%)                                               |                         |                         |                         |
| Yes                                                        | 5 ( 1.5)                | 1 ( 0.6)                | 4 ( 2.4)                |
| No                                                         | 81 (24.2)               | 53 (31.7)               | 28 (16.7)               |
| Missing                                                    | 249 (74.3)              | 113 (67.7)              | 136 (81.0)              |
| Death (%)                                                  |                         |                         |                         |
| Yes                                                        | 6 ( 1.8)                | 2 ( 1.2)                | 4 ( 2.4)                |
| No                                                         | 329 (98.2)              | 165 (98.8)              | 164 (97.6)              |
| Hospital free days (mean (SD))                             |                         |                         |                         |
|                                                            | 107.09 (16.79)          | 106.38 (15.70)          | 107.80 (17.83)          |
| Hospital free days (median [IQR])                          |                         |                         |                         |
|                                                            | 112.00 [112.00, 112.00] | 112.00 [109.00, 112.00] | 112.00 [112.00, 112.00] |
| Hospital and ED free days (mean (SD))                      |                         |                         |                         |
|                                                            | 106.54 (16.88)          | 105.77 (15.85)          | 107.31 (17.86)          |
| Hospital and ED free days (median [IQR])                   |                         |                         |                         |
|                                                            | 112.00 [110.00, 112.00] | 112.00 [107.00, 112.00] | 112.00 [111.00, 112.00] |
| Self-reported number of buprenorphine fills (mean (SD))    |                         |                         |                         |
|                                                            | 7.60 (7.57)             | 10.26 (7.80)            | 3.65 (5.17)             |
| Self-reported number of buprenorphine fills (median [IQR]) |                         |                         |                         |
|                                                            | 6.00 [0.00, 15.00]      | 10.00 [4.00, 16.00]     | 1.00 [0.00, 6.00]       |
| Missing                                                    | 258 (77.0)              | 121 (72.5)              | 137 (81.5)              |

628 Figure 3a: Number of Readmissions

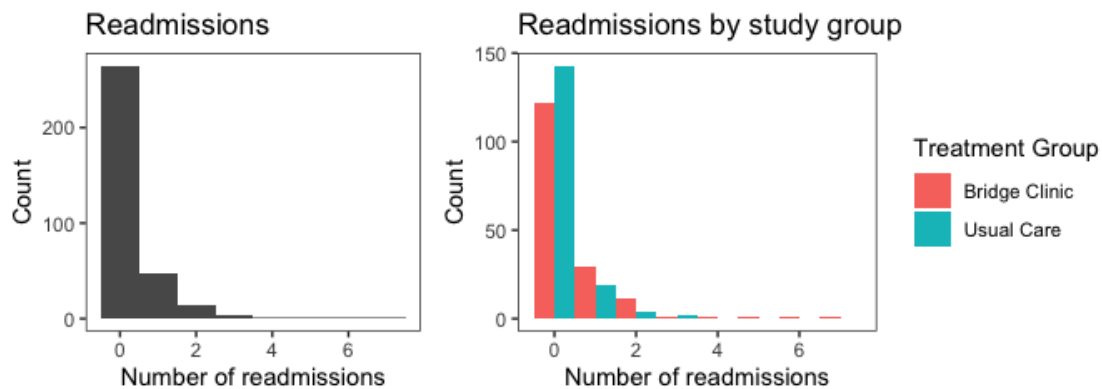

629

630 Figure 3b: Number of ED Visits

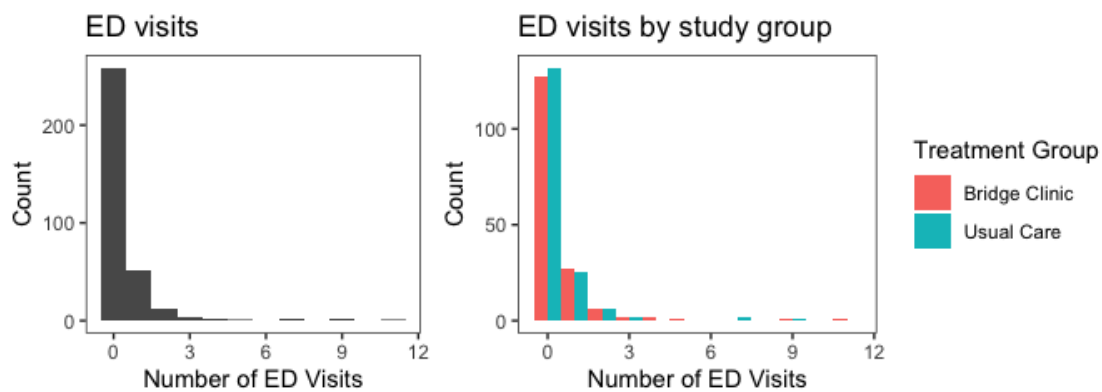

631

632 Figure 3c: Number of Readmissions or ED Visits

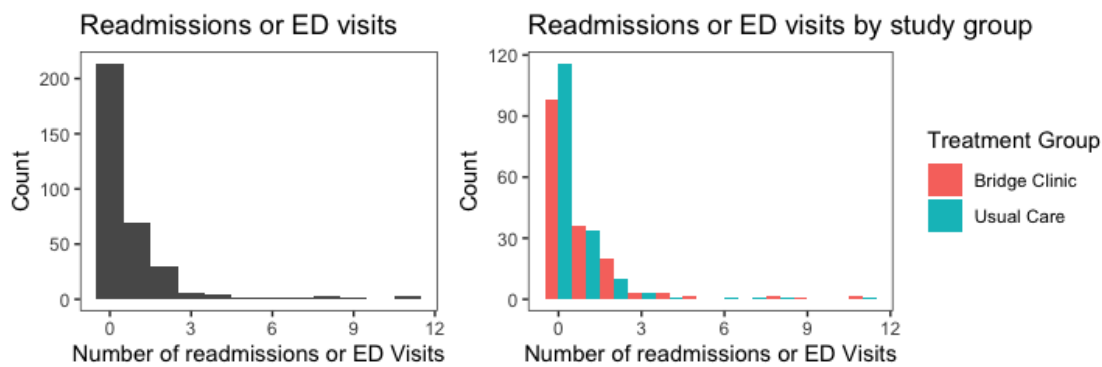

633

634

635 Figure 4: Cost of care

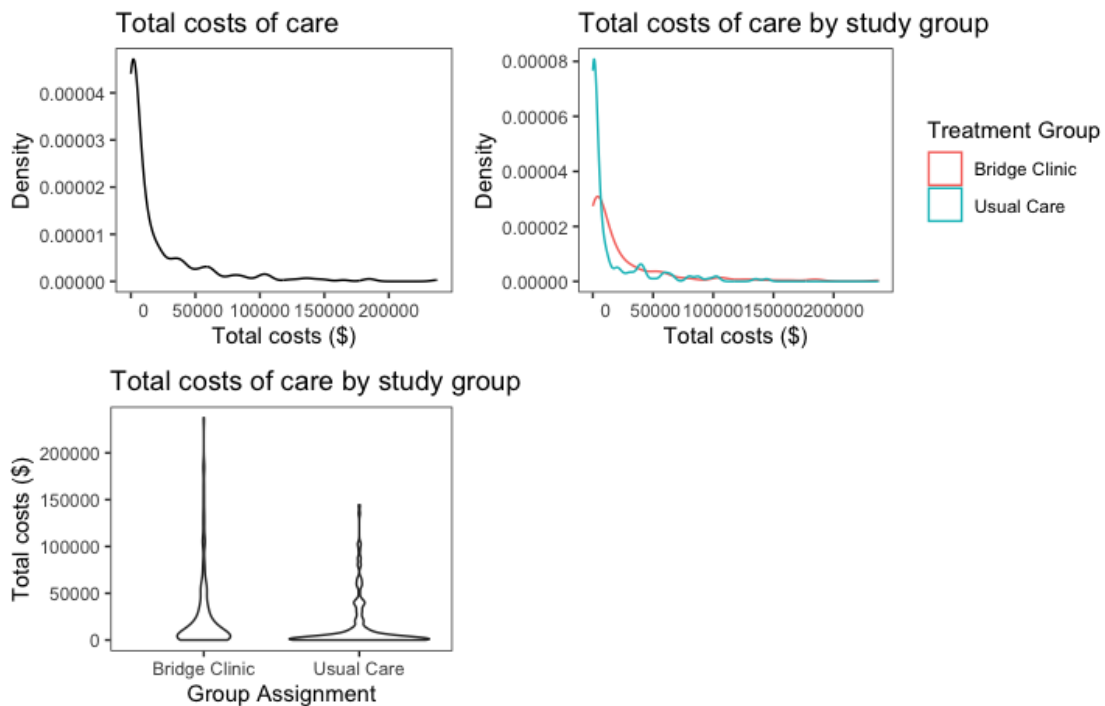

636

637 Figure 5: Quality of life

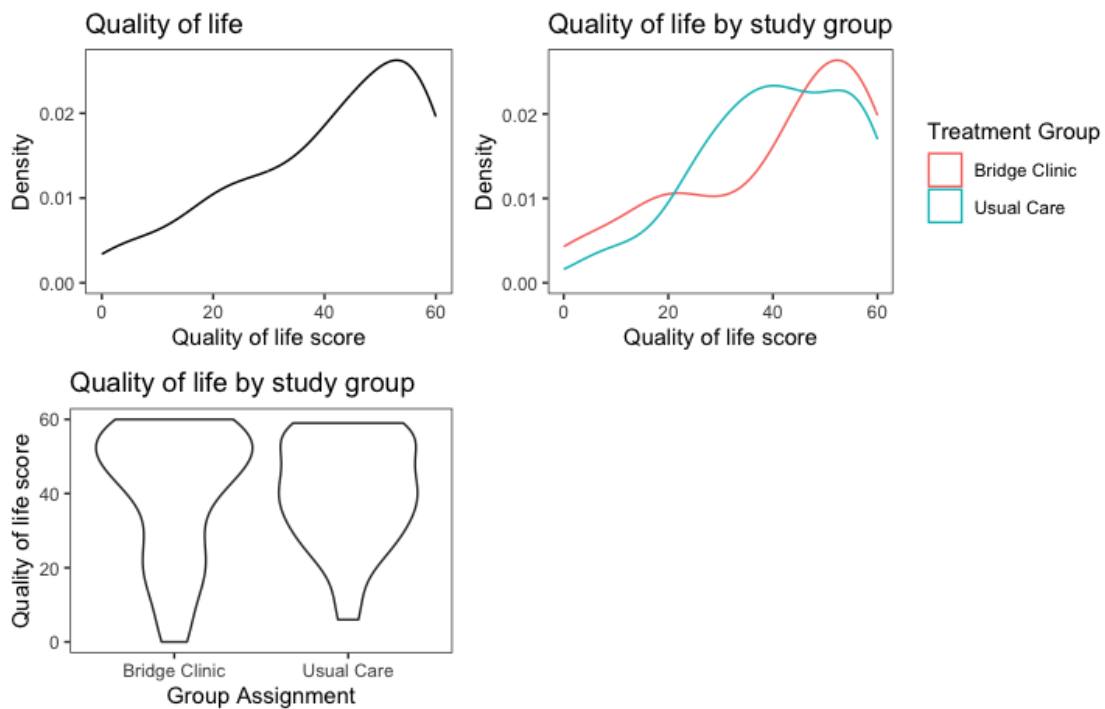

638

639

640 **Table 4: Exploratory Outcomes**

641 **Exploratory outcomes for OPAT patients will not be compared between study groups but will**  
 642 **be reported by study group**

643 Exploratory endpoints have been specified for patients with infection suitable for outpatient  
 644 antibiotic therapy (OPAT) management

645

646 • New, persistent, or recurrent infection: defined by positive culture and/or change in  
 647 antibiotic regimen

648 • Completion of antibiotic therapy

649 • Days from negative blood culture (i.e., blood draw date) to first hospital discharge

650

|                                                 | Overall              | Bridge Clinic        | Usual Care        |
|-------------------------------------------------|----------------------|----------------------|-------------------|
| N                                               | 7                    | 6                    | 1                 |
| New, persistent, or recurrent infection (%)     |                      |                      |                   |
| No                                              | 7 (100.0)            | 6 (100.0)            | 1 (100.0)         |
| Yes                                             | 0 ( 0.0)             | 0 ( 0.0)             | 0 ( 0.0)          |
| Completion of antibiotic therapy (%)            |                      |                      |                   |
| No                                              | 1 ( 14.3)            | 0 ( 0.0)             | 1 (100.0)         |
| Yes                                             | 6 ( 85.7)            | 6 (100.0)            | 0 ( 0.0)          |
| Days from negative blood culture (mean (SD))    | 17.40 (8.96)         | 19.75 (8.38)         | 8.00 (NA)         |
| Days from negative blood culture (median [IQR]) | 15.00 [12.00, 21.00] | 18.00 [14.25, 23.50] | 8.00 [8.00, 8.00] |
| Missing                                         | 2 (28.6)             | 2 (33.3)             | 0 ( 0.0)          |

651

652 **Table 5a: Implementation Outcome - Acceptance of Bridge Clinic**

653

- 654 • Acceptance of Bridge Clinic as a bridging provider, defined by being physically checked  
 655 in for at least 1 visit with the Bridge Clinic within 16 weeks of follow up.

656

|                                      |     | Overall    | Bridge Clinic | Usual Care |
|--------------------------------------|-----|------------|---------------|------------|
| n                                    |     | 335        | 167           | 168        |
| At least one Bridge Clinic Visit (%) | No  | 237 (70.7) | 70 (41.9)     | 167 (99.4) |
|                                      | Yes | 98 (29.3)  | 97 (58.1)     | 1 ( 0.6)   |

657

658 **Table 5b: Implementation Outcome - Reasons for ineligibility**

659

- 660 • Reasons for ineligibility among participants screened, specifically:  
 661 – Absence of a qualifying OUD  
 662 – ACT determines the participant does not qualify

663

|                                                                            | Overall  |
|----------------------------------------------------------------------------|----------|
| n (number screened but not enrolled)                                       | 37       |
| Does the patient have OUD? = No (%)                                        | 1 (11.1) |
| Does the ACT believe the patient is a candidate for Bridge Clinic = No (%) | 3 (60.0) |

664



665 **Table 6: Fidelity Outcome**

666

- 667 • Intervention Contamination: defined as when a patient randomized to usual care is  
 668 offered the Bridge Clinic, or when a patient is randomized to Bridge Clinic but is only  
 669 offered usual care, at the time of discharge from the inpatient stay.

670

|                                            | Overall | Bridge Clinic | Usual Care |
|--------------------------------------------|---------|---------------|------------|
| n                                          | 335     | 167           | 168        |
| Intervention<br>Contamination = Yes<br>(%) | 1 (1.2) | 1 (1.9)       | 0 (0.0)    |

671

## 672 Primary Analysis

- 673 • Since the data are positive and skewed, a proportional odds model is used

674

## 675 Unadjusted Primary Analysis

- 676 • Outcome: index hospital length of stay (hours)
- 677 • Predictor: Group assignment (Bridge Clinic or usual care)
- 678 • Number of observations included in this analysis: 335

679

|                                                | Low | High | Diff. | Effect | S.E. | Lower 0.95 | Upper 0.95 | Type |
|------------------------------------------------|-----|------|-------|--------|------|------------|------------|------|
| Group Assignment (Bridge Clinic vs Usual Care) | 2   | 1    |       | -0.06  | 0.19 | -0.43      | 0.31       | 1    |
| Odds Ratio                                     | 2   | 1    |       | 0.94   |      | 0.65       | 1.37       | 2    |

680 The unadjusted OR (95% CI) for the index hospital length of stay being longer for a subject in  
 681 Bridge Clinic vs Usual Care is 0.944 (0.651-1.368),  $p = 0.761$ .

682

## 683 Adjusted Primary Analysis

684

### 685 Multiple Imputation

- 686 • Multiple imputation was used to impute missing data for race and ethnicity

### 687 Proportional Odds Model

- 688 • Outcome: index hospital length of stay (hours)
- 689 • Predictor: Group assignment (Bridge Clinic or usual care)
- 690 • Adjusted for age, race, ethnicity, area deprivation index (quartiles)
  - 691 – Restricted cubic splines are used for continuous covariates (with 3 knots)
    - 692 • Age
- 693 • Number of observations included in this analysis: 335

694

|                                                    | Low   | High  | Diff. | Effect | S.E. | Lower<br>0.95 | Upper<br>0.95 | Type |
|----------------------------------------------------|-------|-------|-------|--------|------|---------------|---------------|------|
| Age                                                | 31.93 | 45.72 | 13.79 | 0.26   | 0.16 | -0.05         | 0.58          | 1    |
| Odds Ratio                                         | 31.93 | 45.72 | 13.79 | 1.30   |      | 0.95          | 1.79          | 2    |
| Group Assignment (Bridge Clinic vs Usual Care)     | 2.00  | 1.00  |       | -0.06  | 0.19 | -0.44         | 0.31          | 1    |
| Odds Ratio                                         | 2.00  | 1.00  |       | 0.94   |      | 0.65          | 1.36          | 2    |
| Race (Black or African American vs White)          | 1.00  | 2.00  |       | -0.13  | 0.31 | -0.75         | 0.48          | 1    |
| Odds Ratio                                         | 1.00  | 2.00  |       | 0.87   |      | 0.47          | 1.62          | 2    |
| Race (Other vs White)                              | 1.00  | 3.00  |       | -0.45  | 0.72 | -1.85         | 0.95          | 1    |
| Odds Ratio                                         | 1.00  | 3.00  |       | 0.64   |      | 0.16          | 2.60          | 2    |
| Ethnicity (Hispanic/Latino vs Non-Hispanic/Latino) | 2.00  | 1.00  |       | 0.75   | 0.66 | -0.55         | 2.05          | 1    |
| Odds Ratio                                         | 2.00  | 1.00  |       | 2.12   |      | 0.58          | 7.76          | 2    |
| ADI Quartile (2 vs 1)                              | 1.00  | 2.00  |       | 0.15   | 0.26 | -0.37         | 0.66          | 1    |
| Odds Ratio                                         | 1.00  | 2.00  |       | 1.16   |      | 0.69          | 1.94          | 2    |
| ADI Quartile (3 vs 1)                              | 1.00  | 3.00  |       | 0.12   | 0.26 | -0.40         | 0.63          | 1    |
| Odds Ratio                                         | 1.00  | 3.00  |       | 1.12   |      | 0.67          | 1.88          | 2    |
| ADI Quartile (4 vs 1)                              | 1.00  | 4.00  |       | 0.08   | 0.26 | -0.42         | 0.59          | 1    |
| Odds Ratio                                         | 1.00  | 4.00  |       | 1.09   |      | 0.66          | 1.80          | 2    |

695 The adjusted OR (95% CI) for the index hospital length of stay being longer for a subject in  
696 Bridge Clinic vs Usual Care is 0.939 (0.646-1.364),  $p = 0.74$ .

697

698

699 **Test differential treatment effects**

700 Differential treatment effects will be evaluated at a significance level = .2, decided a priori.

- 701 • Age
- 702 • Race
- 703 • Ethnicity
- 704 • Area deprivation index (quartiles)

705

706 **Age**

```

707 ##
708 ## Model 1: los_hrs ~ Group.Assignment. * rcs(AGE, 3) + RACE_2 + ETHNI
709 CITY +
710 ##   quartile_grp
711 ## Model 2: los_hrs ~ Group.Assignment. + rcs(AGE, 3) + RACE_2 + ETHNI
712 CITY +
713 ##   quartile_grp
714 ##
715 ## L.R. Chisq      d.f.      P
716 ## 1.5642566    2.0000000  0.4574314

```

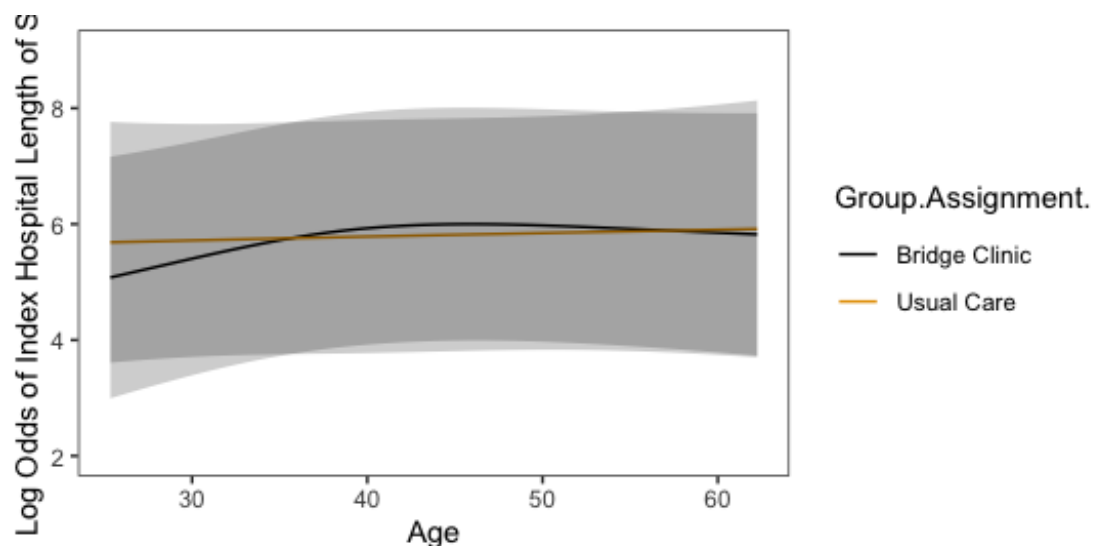

717 RACE\_2=White ETHNICITY=Non-Hispanic/Latino quartile\_grp=Quartile 1

718 There is no evidence suggesting that the effect of intervention group on the index hospital  
 719 length of stay depends on age (p-value = 0.457).

720

721 **Race**

```

722 ##
723 ## Model 1: los_hrs ~ Group.Assignment. * RACE_2 + rcs(AGE, 3) + ETHNI
724 CITY +
725 ##     quartile_grp
726 ## Model 2: los_hrs ~ Group.Assignment. + rcs(AGE, 3) + RACE_2 + ETHNI
727 CITY +
728 ##     quartile_grp
729 ##
730 ## L.R. Chisq      d.f.      P
731 ##  3.055476    2.000000  0.217026

```

732 There is no evidence suggesting that the effect of intervention group on the index hospital  
733 length of stay depends on race (p-value = 0.217).

#### 734 Ethnicity

```

735 ##
736 ## Model 1: los_hrs ~ Group.Assignment. * ETHNICITY + rcs(AGE, 3) + RA
737 CE_2 +
738 ##     quartile_grp
739 ## Model 2: los_hrs ~ Group.Assignment. + rcs(AGE, 3) + RACE_2 + ETHNI
740 CITY +
741 ##     quartile_grp
742 ##
743 ## L.R. Chisq      d.f.      P
744 ##  0.1975030    1.0000000  0.6567439

```

745 There is no evidence suggesting that the effect of intervention group on the index hospital  
746 length of stay depends on ethnicity (p-value = 0.657).

#### 747 Area Deprivation Index (Quartiles)

```

748 ##
749 ## Model 1: los_hrs ~ Group.Assignment. * quartile_grp + rcs(AGE, 3) +
750 RACE_2 +
751 ##     ETHNICITY
752 ## Model 2: los_hrs ~ Group.Assignment. + rcs(AGE, 3) + RACE_2 + ETHNI
753 CITY +
754 ##     quartile_grp
755 ##
756 ## L.R. Chisq      d.f.      P
757 ##  0.1354324    3.0000000  0.9872701

```

758 There is no evidence suggesting that the effect of intervention group on the index hospital  
759 length of stay depends on area deprivation index (p-value = 0.987).

760

## 761 Secondary Analysis

- 762 • Continuous outcomes will be compared between study groups like the primary outcome:  
763 proportional odds model
- 764 • Binary endpoints will use a logit link function
- 765 • For counts either a zero-inflated Poisson or a negative binomial model will be fit.
- 766 • If there are missing outcomes, these may be imputed if they occur in less than 5% of cases.  
767 Otherwise, the cohort for which the outcome is available will be described, along with the  
768 results of the model evaluating treatment effects in this cohort.
- 769 • No adjustments for multiplicity will be made.
- 770 • Missing data for covariates will be imputed using single imputation
  - 771 – Modes will be imputed for categorical variables
  - 772 – Means will be imputed for continuous variables

773

774

775

776

777

778

779

780

781

782

783

784

785

786

787

788 **Number of readmissions**789 **Unadjusted - Proportional odds model**

- 790 • Outcome: number of readmissions
- 791 • Predictor: Group assignment (Bridge Clinic or usual care)
- 792 • Model: proportional odds model
- 793 • Number of observations included in this analysis: 335

|                                                | Low | High | Diff. | Effect | S.E. | Lower 0.95 | Upper 0.95 | Type |
|------------------------------------------------|-----|------|-------|--------|------|------------|------------|------|
| Group Assignment (Bridge Clinic vs Usual Care) | 1   | 2    |       | 0.77   | 0.28 | 0.23       | 1.31       | 1    |
| Odds Ratio                                     | 1   | 2    |       | 2.15   |      | 1.25       | 3.71       | 2    |

794 The unadjusted OR (95% CI) for the number of readmissions being greater for a subject in  
 795 Bridge Clinic vs Usual Care is 2.155 (1.252-3.707).

796

797

798 **Adjusted - Proportional odds model**

- 799 • Proportional odds model
- 800 • Single imputation was used to impute missing data for race and ethnicity
- 801 • Outcome: number of readmissions
- 802 • Predictor: Group assignment (Bridge Clinic or usual care)
- 803 • Adjusted for age, race, ethnicity, area deprivation index (quartiles)
  - 804 – Restricted cubic splines are used for continuous covariates (with 3 knots)
    - 805 • Age
- 806 • Number of observations included in this analysis: 335

|                                                | Low   | High  | Diff. | Effect | S.E. | Lower 0.95 | Upper 0.95 | Type |
|------------------------------------------------|-------|-------|-------|--------|------|------------|------------|------|
| Age                                            | 31.93 | 45.72 | 13.79 | 0.25   | 0.24 | -0.22      | 0.71       | 1    |
| Odds Ratio                                     | 31.93 | 45.72 | 13.79 | 1.28   |      | 0.81       | 2.03       | 2    |
| Group Assignment (Bridge Clinic vs Usual Care) | 1.00  | 2.00  |       | 0.77   | 0.28 | 0.22       | 1.32       | 1    |
| Odds Ratio                                     | 1.00  | 2.00  |       | 2.17   |      | 1.25       | 3.76       | 2    |
| Race (Black or African American vs White)      | 1.00  | 2.00  |       | -0.71  | 0.52 | -1.72      | 0.30       | 1    |

|                                                    | Low  | High | Diff. | Effect | S.E.  | Lower 0.95 | Upper 0.95 | Type |
|----------------------------------------------------|------|------|-------|--------|-------|------------|------------|------|
| Odds Ratio                                         | 1.00 | 2.00 |       | 0.49   |       | 0.18       | 1.35       | 2    |
| Race (Other vs White)                              | 1.00 | 3.00 |       | -7.23  | 33.27 | -72.43     | 57.97      | 1    |
| Odds Ratio                                         | 1.00 | 3.00 |       | 0.00   |       | 0.00       | 1.506e+25  | 2    |
| Ethnicity (Hispanic/Latino vs Non-Hispanic/Latino) | 2.00 | 1.00 |       | -7.37  | 31.33 | -68.79     | 54.04      | 1    |
| Odds Ratio                                         | 2.00 | 1.00 |       | 0.00   |       | 0.00       | 2.946e+23  | 2    |
| ADI Quartile (2 vs 1)                              | 1.00 | 2.00 |       | 0.27   | 0.37  | -0.46      | 1.00       | 1    |
| Odds Ratio                                         | 1.00 | 2.00 |       | 1.31   |       | 0.63       | 2.72       | 2    |
| ADI Quartile (3 vs 1)                              | 1.00 | 3.00 |       | -0.53  | 0.42  | -1.35      | 0.29       | 1    |
| Odds Ratio                                         | 1.00 | 3.00 |       | 0.59   |       | 0.26       | 1.33       | 2    |
| ADI Quartile (4 vs 1)                              | 1.00 | 4.00 |       | -0.03  | 0.36  | -0.73      | 0.66       | 1    |
| Odds Ratio                                         | 1.00 | 4.00 |       | 0.97   |       | 0.48       | 1.94       | 2    |

807 The adjusted OR (95% CI) for the number of readmissions being greater for a subject in Bridge  
808 Clinic vs Usual Care is 2.165 (1.246-3.762).

809

810

811

812

813

814

815

816

817

818

819

820



821 **Number of ED visits**822 **Unadjusted - Proportional odds model**

- 823 • Outcome: number of ED visits
- 824 • Predictor: Group assignment (Bridge Clinic or usual care)
- 825 • Model: proportional odds model
- 826 • Number of observations included in this analysis: 335

|                                                | Low | High | Diff. | Effect | S.E. | Lower 0.95 | Upper 0.95 | Type |
|------------------------------------------------|-----|------|-------|--------|------|------------|------------|------|
| Group Assignment (Bridge Clinic vs Usual Care) | 1   | 2    |       | 0.15   | 0.26 | -0.36      | 0.66       | 1    |
| Odds Ratio                                     | 1   | 2    |       | 1.16   |      | 0.70       | 1.93       | 2    |

827 The unadjusted OR (95% CI) for the number of ED visits being greater for a subject in Bridge  
 828 Clinic vs Usual Care is 1.162 (0.699-1.931).

829

830 **Adjusted - Proportional odds model**

- 831 • Proportional odds model
- 832 • Single imputation was used to impute missing data for race and ethnicity
- 833 • Outcome: number of ED visits
- 834 • Predictor: Group assignment (Bridge Clinic or usual care)
- 835 • Adjusted for age, race, ethnicity, area deprivation index (quartiles)
  - 836 – Restricted cubic splines are used for continuous covariates (with 3 knots)
    - 837 • Age
- 838 • Number of observations included in this analysis: 335

|                                                | Low   | High  | Diff. | Effect | S.E. | Lower 0.95 | Upper 0.95 | Type |
|------------------------------------------------|-------|-------|-------|--------|------|------------|------------|------|
| Age                                            | 31.93 | 45.72 | 13.79 | 0.45   | 0.23 | -0.01      | 0.90       | 1    |
| Odds Ratio                                     | 31.93 | 45.72 | 13.79 | 1.57   |      | 0.99       | 2.46       | 2    |
| Group Assignment (Bridge Clinic vs Usual Care) | 1.00  | 2.00  |       | 0.14   | 0.27 | -0.38      | 0.66       | 1    |
| Odds Ratio                                     | 1.00  | 2.00  |       | 1.15   |      | 0.68       | 1.94       | 2    |
| Race (Black or African American vs White)      | 1.00  | 2.00  |       | 0.48   | 0.39 | -0.29      | 1.25       | 1    |
| Odds Ratio                                     | 1.00  | 2.00  |       | 1.61   |      | 0.75       | 3.50       | 2    |

|                                                    | Low  | High | Diff. | Effect | S.E. | Lower<br>0.95 | Upper<br>0.95 | Type |
|----------------------------------------------------|------|------|-------|--------|------|---------------|---------------|------|
| Race (Other vs White)                              | 1.00 | 3.00 |       | -0.38  | 1.22 | -2.78         | 2.02          | 1    |
| Odds Ratio                                         | 1.00 | 3.00 |       | 0.68   |      | 0.06          | 7.53          | 2    |
| Ethnicity (Hispanic/Latino vs Non-Hispanic/Latino) | 2.00 | 1.00 |       | -0.91  | 1.20 | -3.26         | 1.44          | 1    |
| Odds Ratio                                         | 2.00 | 1.00 |       | 0.40   |      | 0.04          | 4.22          | 2    |
| ADI Quartile (2 vs 1)                              | 1.00 | 2.00 |       | 0.17   | 0.34 | -0.51         | 0.84          | 1    |
| Odds Ratio                                         | 1.00 | 2.00 |       | 1.18   |      | 0.60          | 2.32          | 2    |
| ADI Quartile (3 vs 1)                              | 1.00 | 3.00 |       | -0.67  | 0.40 | -1.44         | 0.11          | 1    |
| Odds Ratio                                         | 1.00 | 3.00 |       | 0.51   |      | 0.24          | 1.12          | 2    |
| ADI Quartile (4 vs 1)                              | 1.00 | 4.00 |       | -0.49  | 0.37 | -1.20         | 0.23          | 1    |
| Odds Ratio                                         | 1.00 | 4.00 |       | 0.62   |      | 0.30          | 1.26          | 2    |

839 The adjusted OR (95% CI) for the number of ED visits being greater for a subject in Bridge Clinic  
840 vs Usual Care is 1.151 (0.683-1.942).

841

842

843

844

845

846

847

848

849

850

851

852 **Number of readmissions or ED visits**853 **Unadjusted - Proportional odds model**

- 854 • Outcome: number of readmissions or ED visits
- 855 • Predictor: Group assignment (Bridge Clinic or usual care)
- 856 • Model: proportional odds model
- 857 • Number of observations included in this analysis: 335

|                                                | Low | High | Diff. | Effect | S.E. | Lower 0.95 | Upper 0.95 | Type |
|------------------------------------------------|-----|------|-------|--------|------|------------|------------|------|
| Group Assignment (Bridge Clinic vs Usual Care) | 1   | 2    |       | 0.50   | 0.22 | 0.06       | 0.93       | 1    |
| Odds Ratio                                     | 1   | 2    |       | 1.64   |      | 1.06       | 2.55       | 2    |

858 The unadjusted OR (95% CI) for the number of readmissions or ED visits being greater for a  
 859 subject in Bridge Clinic vs Usual Care is 1.643 (1.06-2.547).

860

861 **Adjusted - Proportional Odds Model**

- 862 • Proportional odds model
- 863 • Single imputation was used to impute missing data for race and ethnicity
- 864 • Outcome: number of readmissions or ED visits
- 865 • Predictor: Group assignment (Bridge Clinic or usual care)
- 866 • Adjusted for age, race, ethnicity, area deprivation index (quartiles)
  - 867 – Restricted cubic splines are used for continuous covariates (with 3 knots)
    - 868 • Age
- 869 • Number of observations included in this analysis: 335

|                                                | Low   | High  | Diff. | Effect | S.E. | Lower 0.95 | Upper 0.95 | Type |
|------------------------------------------------|-------|-------|-------|--------|------|------------|------------|------|
| Age                                            | 31.93 | 45.72 | 13.79 | 0.32   | 0.19 | -0.05      | 0.70       | 1    |
| Odds Ratio                                     | 31.93 | 45.72 | 13.79 | 1.38   |      | 0.95       | 2.01       | 2    |
| Group Assignment (Bridge Clinic vs Usual Care) | 1.00  | 2.00  |       | 0.51   | 0.23 | 0.06       | 0.96       | 1    |
| Odds Ratio                                     | 1.00  | 2.00  |       | 1.66   |      | 1.06       | 2.60       | 2    |
| Race (Black or African American vs White)      | 1.00  | 2.00  |       | 0.12   | 0.36 | -0.59      | 0.83       | 1    |
| Odds Ratio                                     | 1.00  | 2.00  |       | 1.12   |      | 0.55       | 2.29       | 2    |

|                                                    | Low  | High | Diff. | Effect | S.E. | Lower<br>0.95 | Upper<br>0.95 | Type |
|----------------------------------------------------|------|------|-------|--------|------|---------------|---------------|------|
| Race (Other vs White)                              | 1.00 | 3.00 |       | -1.00  | 1.20 | -3.34         | 1.35          | 1    |
| Odds Ratio                                         | 1.00 | 3.00 |       | 0.37   |      | 0.04          | 3.86          | 2    |
| Ethnicity (Hispanic/Latino vs Non-Hispanic/Latino) | 2.00 | 1.00 |       | -1.48  | 1.17 | -3.76         | 0.81          | 1    |
| Odds Ratio                                         | 2.00 | 1.00 |       | 0.23   |      | 0.02          | 2.25          | 2    |
| ADI Quartile (2 vs 1)                              | 1.00 | 2.00 |       | 0.10   | 0.30 | -0.49         | 0.70          | 1    |
| Odds Ratio                                         | 1.00 | 2.00 |       | 1.11   |      | 0.61          | 2.01          | 2    |
| ADI Quartile (3 vs 1)                              | 1.00 | 3.00 |       | -0.85  | 0.34 | -1.52         | -0.17         | 1    |
| Odds Ratio                                         | 1.00 | 3.00 |       | 0.43   |      | 0.22          | 0.84          | 2    |
| ADI Quartile (4 vs 1)                              | 1.00 | 4.00 |       | -0.37  | 0.30 | -0.96         | 0.23          | 1    |
| Odds Ratio                                         | 1.00 | 4.00 |       | 0.69   |      | 0.38          | 1.25          | 2    |

870 The adjusted OR (95% CI) for the number of readmissions or ED visits being greater for a subject  
871 in Bridge Clinic vs Usual Care is 1.661 (1.061-2.6).

872

873

874

875

876

877

878

879

880

881

882

## 883 Recurrent opioid use

## 884 Unadjusted

- 885 • Outcome: recurrent opioid use (yes/no)
- 886 • Predictor: Group assignment (Bridge Clinic or usual care)
- 887 • Model: binary logistic regression model
- 888 • Number of observations included in this analysis: 88

|                                                | Low | High | Diff. | Effect | S.E. | Lower 0.95 | Upper 0.95 | Type |
|------------------------------------------------|-----|------|-------|--------|------|------------|------------|------|
| Group Assignment (Bridge Clinic vs Usual Care) | 1   | 2    |       | -0.24  | 0.45 | -1.11      | 0.64       | 1    |
| Odds Ratio                                     | 1   | 2    |       | 0.79   |      | 0.33       | 1.89       | 2    |

889 The unadjusted OR (95% CI) for a subject in Bridge Clinic to have recurrent opioid use vs a  
 890 subject with usual care is 0.79 (0.329-1.895).

891

892

## 893 Adjusted

- 894 • Binary logistic regression model
- 895 • Single imputation was used to impute missing data for race and ethnicity
- 896 • Outcome: recurrent opioid use (yes/no)
- 897 • Predictor: Group assignment (Bridge Clinic or usual care)
- 898 • Adjusted for age, race, ethnicity, area deprivation index (quartiles)
  - 899 – Restricted cubic splines are used for continuous covariates (with 3 knots)
    - 900 • Age
- 901 • Number of observations included in this analysis: 88

|                                                | Low   | High  | Diff. | Effect | S.E. | Lower 0.95 | Upper 0.95 | Type |
|------------------------------------------------|-------|-------|-------|--------|------|------------|------------|------|
| Age                                            | 31.93 | 45.72 | 13.79 | 0.08   | 0.49 | -0.87      | 1.04       | 1    |
| Odds Ratio                                     | 31.93 | 45.72 | 13.79 | 1.09   |      | 0.42       | 2.83       | 2    |
| Group Assignment (Bridge Clinic vs Usual Care) | 1.00  | 2.00  |       | -0.31  | 0.50 | -1.29      | 0.68       | 1    |
| Odds Ratio                                     | 1.00  | 2.00  |       | 0.74   |      | 0.28       | 1.97       | 2    |
| Race (Black or African American vs White)      | 1.00  | 2.00  |       | 0.94   | 0.78 | -0.58      | 2.46       | 1    |

|                                                    | Low  | High | Diff. | Effect | S.E. | Lower<br>0.95 | Upper<br>0.95 | Type |
|----------------------------------------------------|------|------|-------|--------|------|---------------|---------------|------|
| Odds Ratio                                         | 1.00 | 2.00 |       | 2.56   |      | 0.56          | 11.75         | 2    |
| Race (Other vs White)                              | 1.00 | 3.00 |       | 0.54   | 1.72 | -2.84         | 3.91          | 1    |
| Odds Ratio                                         | 1.00 | 3.00 |       | 1.71   |      | 0.06          | 50.10         | 2    |
| Ethnicity (Hispanic/Latino vs Non-Hispanic/Latino) | 2.00 | 1.00 |       | -0.61  | 1.88 | -4.31         | 3.08          | 1    |
| Odds Ratio                                         | 2.00 | 1.00 |       | 0.54   |      | 0.01          | 21.73         | 2    |
| ADI Quartile (2 vs 1)                              | 1.00 | 2.00 |       | -0.32  | 0.66 | -1.62         | 0.98          | 1    |
| Odds Ratio                                         | 1.00 | 2.00 |       | 0.73   |      | 0.20          | 2.67          | 2    |
| ADI Quartile (3 vs 1)                              | 1.00 | 3.00 |       | 0.67   | 0.64 | -0.58         | 1.92          | 1    |
| Odds Ratio                                         | 1.00 | 3.00 |       | 1.95   |      | 0.56          | 6.82          | 2    |
| ADI Quartile (4 vs 1)                              | 1.00 | 4.00 |       | -0.66  | 0.62 | -1.87         | 0.55          | 1    |
| Odds Ratio                                         | 1.00 | 4.00 |       | 0.52   |      | 0.15          | 1.72          | 2    |

902 The adjusted OR (95% CI) for a subject in Bridge Clinic to have recurrent opioid use vs a subject  
903 with usual care is 0.736 (0.276-1.966).

904

905

906

907

908

909

910

911

912

913

## 914 Opioid use in last 30 days

## 915 Unadjusted

- 916 • Outcome: opioid use in past 30 days (no use, single use, multiple use)
- 917 • Predictor: Group assignment (Bridge Clinic or usual care)
- 918 • Model: proportional odds model
- 919 • Number of observations included in this analysis: 32

|                                                | Low | High | Diff. | Effect | S.E. | Lower 0.95 | Upper 0.95 | Type |
|------------------------------------------------|-----|------|-------|--------|------|------------|------------|------|
| Group Assignment (Bridge Clinic vs Usual Care) | 1   | 2    |       | 1.76   | 0.92 | -0.03      | 3.56       | 1    |
| Odds Ratio                                     | 1   | 2    |       | 5.82   |      | 0.97       | 35.09      | 2    |

920 The unadjusted OR (95% CI) for a subject in Bridge Clinic to have more opioid uses in the past  
 921 30 days vs a subject with usual care is 5.822 (0.966-35.093).

922

## 923 Adjusted

- 924 • Proportional odds model
- 925 • Single imputation was used to impute missing data for race and ethnicity
- 926 • Outcome: opioid use in past 30 days (no use, single use, multiple use)
- 927 • Predictor: Group assignment (Bridge Clinic or usual care)
- 928 • Adjusted for age, race, area deprivation index (quartiles)
  - 929 – Restricted cubic splines are used for continuous covariates (with 3 knots)
    - 930 • Age
  - 931 – This model was not adjusted for ethnicity because all subjects in this model (N =  
 932 32) are Non-Hispanic/Latino
- 933 • Number of observations included in this analysis: 32

|                                                | Low   | High  | Diff. | Effect | S.E. | Lower 0.95 | Upper 0.95 | Type |
|------------------------------------------------|-------|-------|-------|--------|------|------------|------------|------|
| Age                                            | 31.93 | 45.72 | 13.79 | 2.45   | 1.24 | 0.02       | 4.88       | 1    |
| Odds Ratio                                     | 31.93 | 45.72 | 13.79 | 11.62  |      | 1.02       | 132.03     | 2    |
| Group Assignment (Bridge Clinic vs Usual Care) | 1.00  | 2.00  |       | 3.78   | 1.55 | 0.75       | 6.81       | 1    |
| Odds Ratio                                     | 1.00  | 2.00  |       | 43.76  |      | 2.11       | 906.46     | 2    |
| Race (Black or African                         | 1.00  | 2.00  |       | 2.49   | 1.74 | -0.93      | 5.90       | 1    |

|                       | Low  | High | Diff. | Effect   | S.E.  | Lower 0.95 | Upper 0.95 | Type |
|-----------------------|------|------|-------|----------|-------|------------|------------|------|
| American vs White)    |      |      |       |          |       |            |            |      |
| Odds Ratio            | 1.00 | 2.00 |       | 12.04    |       | 0.40       | 366.03     | 2    |
| Race (Other vs White) | 1.00 | 3.00 |       | 9.11     | 72.48 | -132.94    | 151.17     | 1    |
| Odds Ratio            | 1.00 | 3.00 |       | 9,090.16 |       | 0.00       | 4.496e+65  | 2    |
| ADI Quartile (2 vs 1) | 1.00 | 2.00 |       | -0.01    | 1.57  | -3.10      | 3.07       | 1    |
| Odds Ratio            | 1.00 | 2.00 |       | 0.99     |       | 0.05       | 21.57      | 2    |
| ADI Quartile (3 vs 1) | 1.00 | 3.00 |       | -1.06    | 1.74  | -4.47      | 2.35       | 1    |
| Odds Ratio            | 1.00 | 3.00 |       | 0.35     |       | 0.01       | 10.51      | 2    |
| ADI Quartile (4 vs 1) | 1.00 | 4.00 |       | 8.48     | 27.07 | -44.57     | 61.54      | 1    |
| Odds Ratio            | 1.00 | 4.00 |       | 4,829.69 |       | 0.00       | 5.310e+26  | 2    |

934 The adjusted OR (95% CI) for a subject in Bridge Clinic to have more opioid uses in the past 30  
935 days vs a subject with usual care is 43.758 (2.112-906.462).

936

937

938

939

940

941

942

943

944

945

946

947

948 **Total cost of care**

949 **Unadjusted**

950 • Outcome: total cost of care



- 951 • Predictor: Group assignment (Bridge Clinic or usual care)
- 952 • Model: proportional odds model
- 953 • Number of observations included in this analysis: 311

|                                                | Low | High | Diff. | Effect | S.E. | Lower 0.95 | Upper 0.95 | Type |
|------------------------------------------------|-----|------|-------|--------|------|------------|------------|------|
| Group Assignment (Bridge Clinic vs Usual Care) | 1   | 2    |       | 0.82   | 0.2  | 0.42       | 1.21       | 1    |
| Odds Ratio                                     | 1   | 2    |       | 2.27   |      | 1.53       | 3.36       | 2    |

954 The unadjusted OR (95% CI) for the total cost of care being greater for a subject in Bridge Clinic  
 955 vs Usual Care is 2.265 (1.525-3.365).

956

957 **Adjusted**

- 958 • Proportional odds model
- 959 • Single imputation was used to impute missing data for race and ethnicity
- 960 • Outcome: total cost of care
- 961 • Predictor: Group assignment (Bridge Clinic or usual care)
- 962 • Adjusted for age, race, ethnicity, area deprivation index (quartiles)
- 963 – Restricted cubic splines are used for continuous covariates (with 3 knots)
- 964 • Age
- 965 • Number of observations included in this analysis: 311

|                                                | Low   | High  | Diff. | Effect | S.E. | Lower 0.95 | Upper 0.95 | Type |
|------------------------------------------------|-------|-------|-------|--------|------|------------|------------|------|
| Age                                            | 31.93 | 45.72 | 13.79 | 0.53   | 0.16 | 0.21       | 0.86       | 1    |
| Odds Ratio                                     | 31.93 | 45.72 | 13.79 | 1.71   |      | 1.24       | 2.35       | 2    |
| Group Assignment (Bridge Clinic vs Usual Care) | 1.00  | 2.00  |       | 0.81   | 0.20 | 0.41       | 1.21       | 1    |
| Odds Ratio                                     | 1.00  | 2.00  |       | 2.25   |      | 1.51       | 3.35       | 2    |
| Race (Black or African American vs White)      | 1.00  | 2.00  |       | -0.05  | 0.32 | -0.68      | 0.58       | 1    |
| Odds Ratio                                     | 1.00  | 2.00  |       | 0.95   |      | 0.50       | 1.79       | 2    |
| Race (Other vs White)                          | 1.00  | 3.00  |       | 0.14   | 0.73 | -1.29      | 1.56       | 1    |
| Odds Ratio                                     | 1.00  | 3.00  |       | 1.15   |      | 0.27       | 4.78       | 2    |
| Ethnicity (Hispanic/Latino vs Non-             | 2.00  | 1.00  |       | -0.25  | 0.68 | -1.58      | 1.08       | 1    |

|                       | Low  | High | Diff. | Effect | S.E. | Lower<br>0.95 | Upper<br>0.95 | Type |
|-----------------------|------|------|-------|--------|------|---------------|---------------|------|
| Hispanic/Latino)      |      |      |       |        |      |               |               |      |
| Odds Ratio            | 2.00 | 1.00 |       | 0.78   |      | 0.21          | 2.93          | 2    |
| ADI Quartile (2 vs 1) | 1.00 | 2.00 |       | 0.05   | 0.28 | -0.50         | 0.59          | 1    |
| Odds Ratio            | 1.00 | 2.00 |       | 1.05   |      | 0.61          | 1.80          | 2    |
| ADI Quartile (3 vs 1) | 1.00 | 3.00 |       | -0.62  | 0.27 | -1.15         | -0.08         | 1    |
| Odds Ratio            | 1.00 | 3.00 |       | 0.54   |      | 0.32          | 0.92          | 2    |
| ADI Quartile (4 vs 1) | 1.00 | 4.00 |       | -0.39  | 0.26 | -0.91         | 0.12          | 1    |
| Odds Ratio            | 1.00 | 4.00 |       | 0.68   |      | 0.40          | 1.13          | 2    |

966 The adjusted OR (95% CI) for the total cost of care being greater for a subject in Bridge Clinic vs  
967 Usual Care is 2.25 (1.513-3.346).

968

969

970

971

972

973

974

975

976

977

978 [Linkage to MOUD provider](#)

979 [Unadjusted](#)

980 • Outcome: Linkage to MOUD provider (yes/no)

981 • Predictor: Group assignment (Bridge Clinic or usual care)

982 • Model: binary logistic regression model

983 • Number of observations included in this analysis: 88

|                                                | Low | High | Diff. | Effect | S.E. | Lower 0.95 | Upper 0.95 | Type |
|------------------------------------------------|-----|------|-------|--------|------|------------|------------|------|
| Group Assignment (Bridge Clinic vs Usual Care) | 1   | 2    |       | 1.03   | 0.49 | 0.06       | 1.99       | 1    |
| Odds Ratio                                     | 1   | 2    |       | 2.80   |      | 1.07       | 7.35       | 2    |

984 The unadjusted OR (95% CI) for a subject in Bridge Clinic to attend at least one visit with a  
 985 MOUD provider vs a subject in usual care is 2.799 (1.066-7.351).

986

#### 987 Adjusted

- 988 • Binary logistic regression model
  - 989 • Single imputation was used to impute missing data for race and ethnicity
  - 990 • Outcome: Linkage to MOUD provider (yes/no)
  - 991 • Predictor: Group assignment (Bridge Clinic or usual care)
  - 992 • Adjusted for age, race, ethnicity, area deprivation index (quartiles)
    - 993 – Restricted cubic splines are used for continuous covariates (with 3 knots)
      - 994 • Age
  - 995 • Number of observations included in this analysis: 88
- 996

|                                                    | Low   | High  | Diff. | Effect    | S.E.  | Lower 0.95 | Upper 0.95 | Type |
|----------------------------------------------------|-------|-------|-------|-----------|-------|------------|------------|------|
| Age                                                | 31.93 | 45.72 | 13.79 | 0.54      | 0.56  | -0.55      | 1.63       | 1    |
| Odds Ratio                                         | 31.93 | 45.72 | 13.79 | 1.72      |       | 0.58       | 5.10       | 2    |
| Group Assignment (Bridge Clinic vs Usual Care)     | 1.00  | 2.00  |       | 0.92      | 0.57  | -0.19      | 2.03       | 1    |
| Odds Ratio                                         | 1.00  | 2.00  |       | 2.51      |       | 0.82       | 7.64       | 2    |
| Race (Black or African American vs White)          | 1.00  | 2.00  |       | -1.56     | 0.85  | -3.23      | 0.10       | 1    |
| Odds Ratio                                         | 1.00  | 2.00  |       | 0.21      |       | 0.04       | 1.10       | 2    |
| Race (Other vs White)                              | 1.00  | 3.00  |       | 13.79     | 57.02 | -97.97     | 125.54     | 1    |
| Odds Ratio                                         | 1.00  | 3.00  |       | 9.702e+05 |       | 0.00       | 3.328e+54  | 2    |
| Ethnicity (Hispanic/Latino vs Non-Hispanic/Latino) | 2.00  | 1.00  |       | -6.92     | 41.87 | -88.99     | 75.15      | 1    |
| Odds Ratio                                         | 2.00  | 1.00  |       | 0.00      |       | 0.00       | 4.338e+32  | 2    |
| ADI Quartile (2 vs 1)                              | 1.00  | 2.00  |       | 1.03      | 0.85  | -0.64      | 2.70       | 1    |

|                       | Low  | High | Diff. | Effect | S.E. | Lower 0.95 | Upper 0.95 | Type |
|-----------------------|------|------|-------|--------|------|------------|------------|------|
| Odds Ratio            | 1.00 | 2.00 |       | 2.79   |      | 0.53       | 14.87      | 2    |
| ADI Quartile (3 vs 1) | 1.00 | 3.00 |       | -0.54  | 0.72 | -1.95      | 0.87       | 1    |
| Odds Ratio            | 1.00 | 3.00 |       | 0.58   |      | 0.14       | 2.38       | 2    |
| ADI Quartile (4 vs 1) | 1.00 | 4.00 |       | 0.09   | 0.70 | -1.27      | 1.45       | 1    |
| Odds Ratio            | 1.00 | 4.00 |       | 1.09   |      | 0.28       | 4.28       | 2    |

997 The adjusted OR (95% CI) for a subject in Bridge Clinic to attend at least one visit with a MOUD  
 998 provider vs a subject in usual care is 2.509 (0.824-7.64).

999

1000

1001

1002

1003

1004

1005

1006

1007

1008

1009 **Quality of life**1010 **Unadjusted**

- 1011 • Outcome: quality of life score
- 1012 • Predictor: Group assignment (Bridge Clinic or usual care)
- 1013 • Model: proportional odds model
- 1014 • Number of observations included in this analysis: 86

|                                                | Low | High | Diff. | Effect | S.E. | Lower 0.95 | Upper 0.95 | Type |
|------------------------------------------------|-----|------|-------|--------|------|------------|------------|------|
| Group Assignment (Bridge Clinic vs Usual Care) | 1   | 2    |       | 0.17   | 0.38 | -0.58      | 0.92       | 1    |
| Odds Ratio                                     | 1   | 2    |       | 1.18   |      | 0.56       | 2.50       | 2    |

1015 The unadjusted OR (95% CI) for the quality of life score being greater for a subject in Bridge  
 1016 Clinic vs Usual Care is 1.181 (0.558-2.498).

1017

1018

1019 **Adjusted**

- 1020 • Proportional odds mode1
- 1021 • Single imputation was used to impute missing data for race and ethnicity
- 1022 • Outcome: quality of life score
- 1023 • Predictor: Group assignment (Bridge Clinic or usual care)
- 1024 • Adjusted for age, race, ethnicity, area deprivation index (quartiles)
  - 1025 – Restricted cubic splines are used for continuous covariates (with 3 knots)
    - 1026 • Age
- 1027 • Number of observations included in this analysis: 86

1028

|                                                | Low   | High  | Diff. | Effect | S.E. | Lower 0.95 | Upper 0.95 | Type |
|------------------------------------------------|-------|-------|-------|--------|------|------------|------------|------|
| Age                                            | 31.93 | 45.72 | 13.79 | -0.42  | 0.43 | -1.27      | 0.43       | 1    |
| Odds Ratio                                     | 31.93 | 45.72 | 13.79 | 0.66   |      | 0.28       | 1.53       | 2    |
| Group Assignment (Bridge Clinic vs Usual Care) | 1.00  | 2.00  |       | 0.02   | 0.41 | -0.79      | 0.83       | 1    |
| Odds Ratio                                     | 1.00  | 2.00  |       | 1.02   |      | 0.45       | 2.29       | 2    |
| Race (Black or African American vs White)      | 1.00  | 2.00  |       | -0.84  | 0.59 | -2.00      | 0.32       | 1    |

|                                                    | Low  | High | Diff. | Effect | S.E. | Lower<br>0.95 | Upper<br>0.95 | Type |
|----------------------------------------------------|------|------|-------|--------|------|---------------|---------------|------|
| Odds Ratio                                         | 1.00 | 2.00 |       | 0.43   |      | 0.14          | 1.38          | 2    |
| Race (Other vs White)                              | 1.00 | 3.00 |       | -2.17  | 1.27 | -4.67         | 0.32          | 1    |
| Odds Ratio                                         | 1.00 | 3.00 |       | 0.11   |      | 0.01          | 1.38          | 2    |
| Ethnicity (Hispanic/Latino vs Non-Hispanic/Latino) | 2.00 | 1.00 |       | 0.76   | 1.42 | -2.03         | 3.54          | 1    |
| Odds Ratio                                         | 2.00 | 1.00 |       | 2.13   |      | 0.13          | 34.60         | 2    |
| ADI Quartile (2 vs 1)                              | 1.00 | 2.00 |       | -0.25  | 0.57 | -1.37         | 0.87          | 1    |
| Odds Ratio                                         | 1.00 | 2.00 |       | 0.78   |      | 0.25          | 2.39          | 2    |
| ADI Quartile (3 vs 1)                              | 1.00 | 3.00 |       | -0.50  | 0.56 | -1.59         | 0.60          | 1    |
| Odds Ratio                                         | 1.00 | 3.00 |       | 0.61   |      | 0.20          | 1.82          | 2    |
| ADI Quartile (4 vs 1)                              | 1.00 | 4.00 |       | -0.10  | 0.51 | -1.10         | 0.91          | 1    |
| Odds Ratio                                         | 1.00 | 4.00 |       | 0.91   |      | 0.33          | 2.47          | 2    |

1029 The adjusted OR (95% CI) for the quality of life score being greater for a subject in Bridge Clinic  
1030 vs Usual Care is 1.019 (0.453-2.295).

1031

1032

1033

1034

1035

1036

1037

1038

1039

1040

1041 **Overdose**1042 **Unadjusted**

- 1043 • Outcome: Overdose (yes/no)
- 1044 • Predictor: Group assignment (Bridge Clinic or usual care)
- 1045 • Model: binary logistic regression model
- 1046 • Number of observations included in this analysis: 86

|                                                | Low | High | Diff. | Effect | S.E. | Lower 0.95 | Upper 0.95 | Type |
|------------------------------------------------|-----|------|-------|--------|------|------------|------------|------|
| Group Assignment (Bridge Clinic vs Usual Care) | 1   | 2    |       | -2.02  | 1.14 | -4.26      | 0.21       | 1    |
| Odds Ratio                                     | 1   | 2    |       | 0.13   |      | 0.01       | 1.24       | 2    |

1047 The unadjusted OR (95% CI) for a subject in Bridge Clinic to overdose vs a subject in usual care is  
 1048 0.132 (0.014-1.239).

1049

1050 **Adjusted**

- 1051 • Binary logistic regression model
- 1052 • Single imputation was used to impute missing data for race and ethnicity
- 1053 • Outcome: Overdose (yes/no)
- 1054 • Predictor: Group assignment (Bridge Clinic or usual care)
- 1055 • Adjusted for age, race, ethnicity, area deprivation index (quartiles)
- 1056 – Restricted cubic splines are used for continuous covariates (with 3 knots)
- 1057 • Age
- 1058 • Number of observations included in this analysis: 86

1059

|                                                | Low   | High  | Diff. | Effect | S.E. | Lower 0.95 | Upper 0.95 | Type |
|------------------------------------------------|-------|-------|-------|--------|------|------------|------------|------|
| Age                                            | 31.93 | 45.72 | 13.79 | -1.51  | 1.73 | -4.90      | 1.88       | 1    |
| Odds Ratio                                     | 31.93 | 45.72 | 13.79 | 0.22   |      | 0.01       | 6.53       | 2    |
| Group Assignment (Bridge Clinic vs Usual Care) | 1.00  | 2.00  |       | -2.11  | 1.33 | -4.72      | 0.51       | 1    |
| Odds Ratio                                     | 1.00  | 2.00  |       | 0.12   |      | 0.01       | 1.66       | 2    |
| Race (Black or African American vs             | 1.00  | 2.00  |       | -0.28  | 1.36 | -2.94      | 2.38       | 1    |

|                                                    | Low  | High | Diff. | Effect | S.E.   | Lower 0.95 | Upper 0.95 | Type |
|----------------------------------------------------|------|------|-------|--------|--------|------------|------------|------|
| White)                                             |      |      |       |        |        |            |            |      |
| Odds Ratio                                         | 1.00 | 2.00 |       | 0.76   |        | 0.05       | 10.80      | 2    |
| Race (Other vs White)                              | 1.00 | 3.00 |       | -3.71  | 135.96 | -270.19    | 262.77     | 1    |
| Odds Ratio                                         | 1.00 | 3.00 |       | 0.02   |        | 0.00       | 1.315e+114 | 2    |
| Ethnicity (Hispanic/Latino vs Non-Hispanic/Latino) | 2.00 | 1.00 |       | -8.63  | 135.95 | -275.08    | 257.82     | 1    |
| Odds Ratio                                         | 2.00 | 1.00 |       | 0.00   |        | 0.00       | 9.335e+111 | 2    |
| ADI Quartile (2 vs 1)                              | 1.00 | 2.00 |       | 0.63   | 1.45   | -2.21      | 3.46       | 1    |
| Odds Ratio                                         | 1.00 | 2.00 |       | 1.87   |        | 0.11       | 31.91      | 2    |
| ADI Quartile (3 vs 1)                              | 1.00 | 3.00 |       | 0.84   | 1.40   | -1.90      | 3.58       | 1    |
| Odds Ratio                                         | 1.00 | 3.00 |       | 2.32   |        | 0.15       | 35.89      | 2    |
| ADI Quartile (4 vs 1)                              | 1.00 | 4.00 |       | -7.84  | 35.31  | -77.05     | 61.36      | 1    |
| Odds Ratio                                         | 1.00 | 4.00 |       | 0.00   |        | 0.00       | 4.465e+26  | 2    |

1060 The adjusted OR (95% CI) for a subject in Bridge Clinic to overdose vs a subject in usual care is  
 1061 0.122 (0.009-1.659).

1062

1063

1064

1065

1066

1067

1068

1069 **Death**

1070 **Unadjusted**

1071 • Outcome: Death (yes/no)



- 1072 • Predictor: Group assignment (Bridge Clinic or usual care)
- 1073 • Model: binary logistic regression model
- 1074 • Number of observations included in this analysis: 335

|                                                | Low | High | Diff. | Effect | S.E. | Lower 0.95 | Upper 0.95 | Type |
|------------------------------------------------|-----|------|-------|--------|------|------------|------------|------|
| Group Assignment (Bridge Clinic vs Usual Care) | 1   | 2    |       | -0.7   | 0.87 | -2.41      | 1.01       | 1    |
| Odds Ratio                                     | 1   | 2    |       | 0.5    |      | 0.09       | 2.75       | 2    |

- 1075 The unadjusted OR (95% CI) for a subject in Bridge Clinic to die within the 16 week follow up  
 1076 period vs a subject in usual care is 0.497 (0.09-2.751).

1077

1078

1079 **Adjusted**

- 1080 • Binary logistic regression model
- 1081 • Single imputation was used to impute missing data for race and ethnicity
- 1082 • Outcome: Death (yes/no)
- 1083 • Predictor: Group assignment (Bridge Clinic or usual care)
- 1084 • Adjusted for age, race, ethnicity, area deprivation index (quartiles)
  - 1085 – Restricted cubic splines are used for continuous covariates (with 3 knots)
  - 1086 • Age
- 1087 • Number of observations included in this analysis: 335

|                                                | Low   | High  | Diff. | Effect | S.E.  | Lower 0.95 | Upper 0.95 | Type |
|------------------------------------------------|-------|-------|-------|--------|-------|------------|------------|------|
| Age                                            | 31.93 | 45.72 | 13.79 | 0.50   | 0.81  | -1.09      | 2.09       | 1    |
| Odds Ratio                                     | 31.93 | 45.72 | 13.79 | 1.65   |       | 0.34       | 8.09       | 2    |
| Group Assignment (Bridge Clinic vs Usual Care) | 1.00  | 2.00  |       | -0.74  | 0.89  | -2.49      | 1.00       | 1    |
| Odds Ratio                                     | 1.00  | 2.00  |       | 0.47   |       | 0.08       | 2.72       | 2    |
| Race (Black or African American vs White)      | 1.00  | 2.00  |       | 0.29   | 1.17  | -2.00      | 2.58       | 1    |
| Odds Ratio                                     | 1.00  | 2.00  |       | 1.34   |       | 0.13       | 13.25      | 2    |
| Race (Other vs White)                          | 1.00  | 3.00  |       | -4.55  | 60.88 | -123.88    | 114.77     | 1    |
| Odds Ratio                                     | 1.00  | 3.00  |       | 0.01   |       | 0.00       | 6.988e+49  | 2    |

|                                                    | Low  | High | Diff. | Effect   | S.E.  | Lower 0.95 | Upper 0.95 | Type |
|----------------------------------------------------|------|------|-------|----------|-------|------------|------------|------|
| Ethnicity (Hispanic/Latino vs Non-Hispanic/Latino) | 2.00 | 1.00 |       | -5.59    | 58.58 | -120.40    | 109.22     | 1    |
| Odds Ratio                                         | 2.00 | 1.00 |       | 0.00     |       | 0.00       | 2.703e+47  | 2    |
| ADI Quartile (2 vs 1)                              | 1.00 | 2.00 |       | 7.31     | 21.64 | -35.10     | 49.72      | 1    |
| Odds Ratio                                         | 1.00 | 2.00 |       | 1,494.94 |       | 0.00       | 3.922e+21  | 2    |
| ADI Quartile (3 vs 1)                              | 1.00 | 3.00 |       | 7.35     | 21.64 | -35.06     | 49.76      | 1    |
| Odds Ratio                                         | 1.00 | 3.00 |       | 1,556.76 |       | 0.00       | 4.074e+21  | 2    |
| ADI Quartile (4 vs 1)                              | 1.00 | 4.00 |       | 7.19     | 21.64 | -35.22     | 49.60      | 1    |
| Odds Ratio                                         | 1.00 | 4.00 |       | 1,324.72 |       | 0.00       | 3.466e+21  | 2    |

1088 The adjusted OR (95% CI) for a subject in Bridge Clinic to die within the 16 week follow up  
 1089 period vs a subject in usual care is 0.475 (0.083-2.721).

1090

1091

1092

1093

1094

1095

1096

1097

1098

1099

1100 **Hospital free days**

1101 **Unadjusted**

1102 • Outcome: hospital free days

1103 • Predictor: Group assignment (Bridge Clinic or usual care)

1104 • Model: proportional odds model

1105 • Number of observations included in this analysis: 335

|                                                | Low | High | Diff. | Effect | S.E. | Lower 0.95 | Upper 0.95 | Type |
|------------------------------------------------|-----|------|-------|--------|------|------------|------------|------|
| Group Assignment (Bridge Clinic vs Usual Care) | 1   | 2    |       | -0.62  | 0.27 | -1.14      | -0.1       | 1    |
| Odds Ratio                                     | 1   | 2    |       | 0.54   |      | 0.32       | 0.9        | 2    |

1106 The unadjusted OR (95% CI) for the number of hospital free days being greater for a subject in  
 1107 Bridge Clinic vs Usual Care is 0.537 (0.32-0.904).

1108

1109

1110 **Adjusted**

- 1111 • Proportional odds model
- 1112 • Single imputation was used to impute missing data for race and ethnicity
- 1113 • Outcome: hospital free days
- 1114 • Predictor: Group assignment (Bridge Clinic or usual care)
- 1115 • Adjusted for age, race, ethnicity, area deprivation index (quartiles)
- 1116 – Restricted cubic splines are used for continuous covariates (with 3 knots)
- 1117 • Age
- 1118 • Number of observations included in this analysis: 335

1119

|                                                    | Low   | High  | Diff. | Effect   | S.E.  | Lower 0.95 | Upper 0.95 | Type |
|----------------------------------------------------|-------|-------|-------|----------|-------|------------|------------|------|
| Age                                                | 31.93 | 45.72 | 13.79 | -0.31    | 0.23  | -0.76      | 0.15       | 1    |
| Odds Ratio                                         | 31.93 | 45.72 | 13.79 | 0.73     |       | 0.47       | 1.16       | 2    |
| Group Assignment (Bridge Clinic vs Usual Care)     | 1.00  | 2.00  |       | -0.61    | 0.27  | -1.14      | -0.08      | 1    |
| Odds Ratio                                         | 1.00  | 2.00  |       | 0.54     |       | 0.32       | 0.92       | 2    |
| Race (Black or African American vs White)          | 1.00  | 2.00  |       | 0.48     | 0.48  | -0.46      | 1.42       | 1    |
| Odds Ratio                                         | 1.00  | 2.00  |       | 1.62     |       | 0.63       | 4.13       | 2    |
| Race (Other vs White)                              | 1.00  | 3.00  |       | 7.17     | 32.70 | -56.92     | 71.27      | 1    |
| Odds Ratio                                         | 1.00  | 3.00  |       | 1,304.81 |       | 0.00       | 8.924e+30  | 2    |
| Ethnicity (Hispanic/Latino vs Non-Hispanic/Latino) | 2.00  | 1.00  |       | 7.31     | 30.83 | -53.11     | 67.73      | 1    |

|                       | Low  | High | Diff. | Effect   | S.E. | Lower 0.95 | Upper 0.95 | Type |
|-----------------------|------|------|-------|----------|------|------------|------------|------|
| Odds Ratio            | 2.00 | 1.00 |       | 1,494.88 |      | 0.00       | 2.607e+29  | 2    |
| ADI Quartile (2 vs 1) | 1.00 | 2.00 |       | -0.33    | 0.36 | -1.03      | 0.37       | 1    |
| Odds Ratio            | 1.00 | 2.00 |       | 0.72     |      | 0.36       | 1.45       | 2    |
| ADI Quartile (3 vs 1) | 1.00 | 3.00 |       | 0.41     | 0.40 | -0.38      | 1.20       | 1    |
| Odds Ratio            | 1.00 | 3.00 |       | 1.50     |      | 0.68       | 3.31       | 2    |
| ADI Quartile (4 vs 1) | 1.00 | 4.00 |       | -0.15    | 0.35 | -0.83      | 0.52       | 1    |
| Odds Ratio            | 1.00 | 4.00 |       | 0.86     |      | 0.44       | 1.69       | 2    |

1120 The adjusted OR (95% CI) for the number of hospital free days being greater for a subject in  
 1121 Bridge Clinic vs Usual Care is 0.543 (0.32-0.92).

1122

1123

1124

1125

1126

1127

1128

1129

1130

1131 **Hospital and ED free days**

1132 **Unadjusted**

1133 • Outcome: hospital and ED free days

1134 • Predictor: Group assignment (Bridge Clinic or usual care)

1135 • Model: proportional odds model

1136 • Number of observations included in this analysis: 335

| Low | High | Diff. | Effect | S.E. | Lower 0.95 | Upper 0.95 | Type |
|-----|------|-------|--------|------|------------|------------|------|
|-----|------|-------|--------|------|------------|------------|------|

|                                                | Low | High | Diff. | Effect | S.E. | Lower 0.95 | Upper 0.95 | Type |
|------------------------------------------------|-----|------|-------|--------|------|------------|------------|------|
| Group Assignment (Bridge Clinic vs Usual Care) | 1   | 2    |       | -0.47  | 0.22 | -0.90      | -0.04      | 1    |
| Odds Ratio                                     | 1   | 2    |       | 0.62   |      | 0.41       | 0.96       | 2    |

1137 The unadjusted OR (95% CI) for the number of hospital and ED free days being greater for a  
 1138 subject in Bridge Clinic vs Usual Care is 0.623 (0.405-0.959).

1139

1140

1141 **Adjusted**

1142 • Proportional odds model

1143 • Single imputation was used to impute missing data for race and ethnicity

1144 • Outcome: hospital and ED free days

1145 • Predictor: Group assignment (Bridge Clinic or usual care)

1146 • Adjusted for age, race, ethnicity, area deprivation index (quartiles)

1147 – Restricted cubic splines are used for continuous covariates (with 3 knots)

1148 • Age

1149 • Number of observations included in this analysis: 335

1150

|                                                    | Low   | High  | Diff. | Effect | S.E. | Lower 0.95 | Upper 0.95 | Type |
|----------------------------------------------------|-------|-------|-------|--------|------|------------|------------|------|
| Age                                                | 31.93 | 45.72 | 13.79 | -0.37  | 0.19 | -0.74      | 0.01       | 1    |
| Odds Ratio                                         | 31.93 | 45.72 | 13.79 | 0.69   |      | 0.48       | 1.01       | 2    |
| Group Assignment (Bridge Clinic vs Usual Care)     | 1.00  | 2.00  |       | -0.50  | 0.22 | -0.93      | -0.06      | 1    |
| Odds Ratio                                         | 1.00  | 2.00  |       | 0.61   |      | 0.39       | 0.95       | 2    |
| Race (Black or African American vs White)          | 1.00  | 2.00  |       | -0.17  | 0.35 | -0.85      | 0.52       | 1    |
| Odds Ratio                                         | 1.00  | 2.00  |       | 0.85   |      | 0.43       | 1.68       | 2    |
| Race (Other vs White)                              | 1.00  | 3.00  |       | 1.01   | 1.20 | -1.34      | 3.36       | 1    |
| Odds Ratio                                         | 1.00  | 3.00  |       | 2.74   |      | 0.26       | 28.76      | 2    |
| Ethnicity (Hispanic/Latino vs Non-Hispanic/Latino) | 2.00  | 1.00  |       | 1.45   | 1.16 | -0.83      | 3.73       | 1    |
| Odds Ratio                                         | 2.00  | 1.00  |       | 4.26   |      | 0.43       | 41.70      | 2    |

|                       | Low  | High | Diff. | Effect | S.E. | Lower<br>0.95 | Upper<br>0.95 | Type |
|-----------------------|------|------|-------|--------|------|---------------|---------------|------|
| ADI Quartile (2 vs 1) | 1.00 | 2.00 |       | -0.18  | 0.29 | -0.75         | 0.40          | 1    |
| Odds Ratio            | 1.00 | 2.00 |       | 0.84   |      | 0.47          | 1.49          | 2    |
| ADI Quartile (3 vs 1) | 1.00 | 3.00 |       | 0.73   | 0.34 | 0.07          | 1.39          | 1    |
| Odds Ratio            | 1.00 | 3.00 |       | 2.08   |      | 1.07          | 4.02          | 2    |
| ADI Quartile (4 vs 1) | 1.00 | 4.00 |       | 0.15   | 0.30 | -0.43         | 0.73          | 1    |
| Odds Ratio            | 1.00 | 4.00 |       | 1.16   |      | 0.65          | 2.08          | 2    |

1151 The adjusted OR (95% CI) for the number of hospital and ED free days being greater for a  
 1152 subject in Bridge Clinic vs Usual Care is 0.609 (0.393-0.945).

1153

1154

1155

1156

1157

1158

1159

1160

1161

1162

## 1163 Number of buprenorphine refills

## 1164 Unadjusted

- 1165 • Outcome: Number of buprenorphine refills
- 1166 • Predictor: Group assignment (Bridge Clinic or usual care)
- 1167 • Model: proportional odds model
- 1168 • Number of observations included in this analysis: 77

|                                                | Low | High | Diff. | Effect | S.E. | Lower 0.95 | Upper 0.95 | Type |
|------------------------------------------------|-----|------|-------|--------|------|------------|------------|------|
| Group Assignment (Bridge Clinic vs Usual Care) | 1   | 2    |       | 1.66   | 0.44 | 0.80       | 2.53       | 1    |
| Odds Ratio                                     | 1   | 2    |       | 5.28   |      | 2.22       | 12.58      | 2    |

1169 The unadjusted OR (95% CI) for the number of buprenorphine refills being greater for a subject  
 1170 in Bridge Clinic vs Usual Care is 5.28 (2.216-12.582).

1171

1172

## 1173 Adjusted

- 1174 • Proportional odds model
- 1175 • Single imputation was used to impute missing data for race and ethnicity
- 1176 • Outcome: Number of buprenorphine refills
- 1177 • Predictor: Group assignment (Bridge Clinic or usual care)
- 1178 • Adjusted for age, race, ethnicity, area deprivation index (quartiles)
  - 1179 – Restricted cubic splines are used for continuous covariates (with 3 knots)
    - 1180 • Age
- 1181 • Number of observations included in this analysis: 77

1182

|                                                | Low   | High  | Diff. | Effect | S.E. | Lower 0.95 | Upper 0.95 | Type |
|------------------------------------------------|-------|-------|-------|--------|------|------------|------------|------|
| Age                                            | 31.93 | 45.72 | 13.79 | 0.69   | 0.49 | -0.26      | 1.65       | 1    |
| Odds Ratio                                     | 31.93 | 45.72 | 13.79 | 2.00   |      | 0.77       | 5.19       | 2    |
| Group Assignment (Bridge Clinic vs Usual Care) | 1.00  | 2.00  |       | 1.93   | 0.50 | 0.94       | 2.91       | 1    |
| Odds Ratio                                     | 1.00  | 2.00  |       | 6.87   |      | 2.56       | 18.42      | 2    |
| Race (Black or African American vs White)      | 1.00  | 2.00  |       | -1.52  | 0.69 | -2.87      | -0.17      | 1    |

|                                                    | Low  | High | Diff. | Effect | S.E. | Lower<br>0.95 | Upper<br>0.95 | Type |
|----------------------------------------------------|------|------|-------|--------|------|---------------|---------------|------|
| Odds Ratio                                         | 1.00 | 2.00 |       | 0.22   |      | 0.06          | 0.85          | 2    |
| Race (Other vs White)                              | 1.00 | 3.00 |       | -0.94  | 1.43 | -3.75         | 1.86          | 1    |
| Odds Ratio                                         | 1.00 | 3.00 |       | 0.39   |      | 0.02          | 6.43          | 2    |
| Ethnicity (Hispanic/Latino vs Non-Hispanic/Latino) | 2.00 | 1.00 |       | -0.58  | 1.83 | -4.15         | 3.00          | 1    |
| Odds Ratio                                         | 2.00 | 1.00 |       | 0.56   |      | 0.02          | 20.15         | 2    |
| ADI Quartile (2 vs 1)                              | 1.00 | 2.00 |       | 0.68   | 0.66 | -0.60         | 1.97          | 1    |
| Odds Ratio                                         | 1.00 | 2.00 |       | 1.98   |      | 0.55          | 7.15          | 2    |
| ADI Quartile (3 vs 1)                              | 1.00 | 3.00 |       | 0.11   | 0.61 | -1.08         | 1.30          | 1    |
| Odds Ratio                                         | 1.00 | 3.00 |       | 1.12   |      | 0.34          | 3.68          | 2    |
| ADI Quartile (4 vs 1)                              | 1.00 | 4.00 |       | 0.12   | 0.55 | -0.96         | 1.20          | 1    |
| Odds Ratio                                         | 1.00 | 4.00 |       | 1.13   |      | 0.38          | 3.33          | 2    |

1183 The adjusted OR (95% CI) for the number of buprenorphine refills being greater for a subject in  
 1184 Bridge Clinic vs Usual Care is 6.872 (2.564-18.416).

1185



## 1186 Implementation Outcome Analysis

- 1187 • Binary endpoint: will use a logit link function
- 1188 • Missing data for covariates will be imputed using single imputation
  - 1189 – Modes will be imputed for categorical variables
  - 1190 – Means will be imputed for continuous variables

## 1191 Acceptance of Bridge Clinic as a bridging provider

### 1192 Unadjusted

- 1193 • Outcome: Acceptance of Bridge Clinic as a bridging provider - attended at least one visit during follow up (yes/no)
- 1194
- 1195 • Predictor: Group assignment (Bridge Clinic or usual care)
- 1196 • Model: binary logistic regression model
- 1197 • Number of observations included in this analysis: 335

|                                                | Low | High | Diff. | Effect | S.E. | Lower<br>0.95 | Upper<br>0.95 | Type |
|------------------------------------------------|-----|------|-------|--------|------|---------------|---------------|------|
| Group Assignment (Bridge Clinic vs Usual Care) | 1   | 2    |       | 5.44   | 1.02 | 3.45          | 7.43          | 1    |
| Odds Ratio                                     | 1   | 2    |       | 231.41 |      | 31.64         | 1,692.42      | 2    |

1198 The unadjusted OR (95% CI) for a subject in Bridge Clinic to attend at least one Bridge Clinic visit  
 1199 during the 16-week follow up vs a subject in usual care is 231.414 (31.642-1692.424).

1200

### 1201 Adjusted

- 1202 • Binary logistic regression model
- 1203 • Single imputation was used to impute missing data for race and ethnicity
- 1204 • Outcome: Acceptance of Bridge Clinic as a bridging provider - attended at least one visit  
 1205 during follow up (yes/no)
- 1206 • Predictor: Group assignment (Bridge Clinic or usual care)
- 1207 • Adjusted for age, race, ethnicity, area deprivation index (quartiles)
  - 1208 – Restricted cubic splines are used for continuous covariates (with 3 knots)
    - 1209 • Age
- 1210 • Number of observations included in this analysis: 335

|     | Low   | High  | Diff. | Effect | S.E. | Lower<br>0.95 | Upper<br>0.95 | Type |
|-----|-------|-------|-------|--------|------|---------------|---------------|------|
| Age | 31.93 | 45.72 | 13.79 | 0.51   | 0.28 | -0.05         | 1.06          | 1    |

|                                                    | Low   | High  | Diff. | Effect | S.E. | Lower<br>0.95 | Upper<br>0.95 | Type |
|----------------------------------------------------|-------|-------|-------|--------|------|---------------|---------------|------|
| Odds Ratio                                         | 31.93 | 45.72 | 13.79 | 1.66   |      | 0.95          | 2.90          | 2    |
| Group Assignment (Bridge Clinic vs Usual Care)     | 1.00  | 2.00  |       | 5.66   | 1.05 | 3.60          | 7.72          | 1    |
| Odds Ratio                                         | 1.00  | 2.00  |       | 287.16 |      | 36.69         | 2,247.69      | 2    |
| Race (Black or African American vs White)          | 1.00  | 2.00  |       | -1.18  | 0.59 | -2.34         | -0.03         | 1    |
| Odds Ratio                                         | 1.00  | 2.00  |       | 0.31   |      | 0.10          | 0.97          | 2    |
| Race (Other vs White)                              | 1.00  | 3.00  |       | 3.20   | 2.30 | -1.31         | 7.71          | 1    |
| Odds Ratio                                         | 1.00  | 3.00  |       | 24.53  |      | 0.27          | 2,221.45      | 2    |
| Ethnicity (Hispanic/Latino vs Non-Hispanic/Latino) | 2.00  | 1.00  |       | -4.44  | 2.43 | -9.20         | 0.33          | 1    |
| Odds Ratio                                         | 2.00  | 1.00  |       | 0.01   |      | 0.00          | 1.39          | 2    |
| ADI Quartile (2 vs 1)                              | 1.00  | 2.00  |       | -0.46  | 0.46 | -1.36         | 0.44          | 1    |
| Odds Ratio                                         | 1.00  | 2.00  |       | 0.63   |      | 0.26          | 1.55          | 2    |
| ADI Quartile (3 vs 1)                              | 1.00  | 3.00  |       | -0.25  | 0.46 | -1.15         | 0.65          | 1    |
| Odds Ratio                                         | 1.00  | 3.00  |       | 0.78   |      | 0.32          | 1.91          | 2    |
| ADI Quartile (4 vs 1)                              | 1.00  | 4.00  |       | 0.19   | 0.44 | -0.67         | 1.05          | 1    |
| Odds Ratio                                         | 1.00  | 4.00  |       | 1.21   |      | 0.51          | 2.86          | 2    |

1211 The adjusted OR (95% CI) for a subject in Bridge Clinic to attend at least one Bridge Clinic visit  
 1212 during the 16-week follow up vs a subject in usual care is 287.163 (36.688-2247.691).

1213

1214

1215 **Post Hoc Analyses**1216 **Binary logistic regression for readmissions, ED visits, and readmission or ED visit**1217 **Readmission: yes/no within 16 week follow up**1218 *Unadjusted*

- 1219 • Outcome: Readmission (yes/no)
- 1220 • Predictor: Group assignment (Bridge Clinic or usual care)
- 1221 • Model: binary logistic regression
- 1222 • Number of observations included in this analysis: 335

|                                                | Low | High | Diff. | Effect | S.E. | Lower 0.95 | Upper 0.95 | Type |
|------------------------------------------------|-----|------|-------|--------|------|------------|------------|------|
| Group Assignment (Bridge Clinic vs Usual Care) | 1   | 2    |       | 0.75   | 0.28 | 0.20       | 1.29       | 1    |
| Odds Ratio                                     | 1   | 2    |       | 2.11   |      | 1.22       | 3.64       | 2    |

1223 The unadjusted OR (95% CI) for a subject in Bridge Clinic to have a readmission within the 16  
 1224 week follow up period vs a subject in usual care is 2.11 (1.223-3.64).

1225 *Adjusted - Proportional odds model*

- 1226 • Binary logistic regression model
- 1227 • Single imputation was used to impute missing data for race and ethnicity
- 1228 • Outcome: Readmission (yes/no)
- 1229 • Predictor: Group assignment (Bridge Clinic or usual care)
- 1230 • Adjusted for age, race, ethnicity, area deprivation index (quartiles)
- 1231 – Restricted cubic splines are used for continuous covariates (with 3 knots)
- 1232 • Age
- 1233 • Number of observations included in this analysis: 335

|                                                | Low   | High  | Diff. | Effect | S.E. | Lower 0.95 | Upper 0.95 | Type |
|------------------------------------------------|-------|-------|-------|--------|------|------------|------------|------|
| Age                                            | 31.93 | 45.72 | 13.79 | 0.27   | 0.24 | -0.21      | 0.74       | 1    |
| Odds Ratio                                     | 31.93 | 45.72 | 13.79 | 1.30   |      | 0.81       | 2.09       | 2    |
| Group Assignment (Bridge Clinic vs Usual Care) | 1.00  | 2.00  |       | 0.74   | 0.28 | 0.19       | 1.30       | 1    |
| Odds Ratio                                     | 1.00  | 2.00  |       | 2.10   |      | 1.21       | 3.67       | 2    |
| Race (Black or African American vs White)      | 1.00  | 2.00  |       | -0.63  | 0.52 | -1.65      | 0.38       | 1    |

|                                                    | Low  | High | Diff. | Effect | S.E.  | Lower 0.95 | Upper 0.95 | Type |
|----------------------------------------------------|------|------|-------|--------|-------|------------|------------|------|
| Odds Ratio                                         | 1.00 | 2.00 |       | 0.53   |       | 0.19       | 1.47       | 2    |
| Race (Other vs White)                              | 1.00 | 3.00 |       | -7.21  | 33.33 | -72.55     | 58.12      | 1    |
| Odds Ratio                                         | 1.00 | 3.00 |       | 0.00   |       | 0.00       | 1.743e+25  | 2    |
| Ethnicity (Hispanic/Latino vs Non-Hispanic/Latino) | 2.00 | 1.00 |       | -7.38  | 31.33 | -68.80     | 54.03      | 1    |
| Odds Ratio                                         | 2.00 | 1.00 |       | 0.00   |       | 0.00       | 2.918e+23  | 2    |
| ADI Quartile (2 vs 1)                              | 1.00 | 2.00 |       | 0.21   | 0.37  | -0.53      | 0.94       | 1    |
| Odds Ratio                                         | 1.00 | 2.00 |       | 1.23   |       | 0.59       | 2.56       | 2    |
| ADI Quartile (3 vs 1)                              | 1.00 | 3.00 |       | -0.59  | 0.42  | -1.41      | 0.23       | 1    |
| Odds Ratio                                         | 1.00 | 3.00 |       | 0.56   |       | 0.24       | 1.26       | 2    |
| ADI Quartile (4 vs 1)                              | 1.00 | 4.00 |       | -0.06  | 0.36  | -0.77      | 0.64       | 1    |
| Odds Ratio                                         | 1.00 | 4.00 |       | 0.94   |       | 0.46       | 1.90       | 2    |

1234 The adjusted OR (95% CI) for a subject in Bridge Clinic to have a readmission within the 16 week  
1235 follow up period vs a subject in usual care is 2.102 (1.205-3.666).

1236 [ED visits: yes/no within 16 week follow up](#)

1237 *Unadjusted*

- 1238 • Outcome: ED Visits (yes/no)
- 1239 • Predictor: Group assignment (Bridge Clinic or usual care)
- 1240 • Model: binary logistic regression
- 1241 • Number of observations included in this analysis: 335

|                                                | Low | High | Diff. | Effect | S.E. | Lower 0.95 | Upper 0.95 | Type |
|------------------------------------------------|-----|------|-------|--------|------|------------|------------|------|
| Group Assignment (Bridge Clinic vs Usual Care) | 1   | 2    |       | 0.14   | 0.26 | -0.37      | 0.66       | 1    |
| Odds Ratio                                     | 1   | 2    |       | 1.15   |      | 0.69       | 1.93       | 2    |

1242 The unadjusted OR (95% CI) for a subject in Bridge Clinic to have an ED visit within the 16 week  
1243 follow up period vs a subject in usual care is 1.155 (0.692-1.927).

1244 *Adjusted - Proportional odds model*

- 1245 • Binary logistic regression model
- 1246 • Single imputation was used to impute missing data for race and ethnicity
- 1247 • Outcome: ED Visit (yes/no)
- 1248 • Predictor: Group assignment (Bridge Clinic or usual care)
- 1249 • Adjusted for age, race, ethnicity, area deprivation index (quartiles)
  - 1250 – Restricted cubic splines are used for continuous covariates (with 3 knots)
  - 1251 • Age
- 1252 • Number of observations included in this analysis: 335

|                                                    | Low   | High  | Diff. | Effect | S.E. | Lower<br>0.95 | Upper<br>0.95 | Type |
|----------------------------------------------------|-------|-------|-------|--------|------|---------------|---------------|------|
| Age                                                | 31.93 | 45.72 | 13.79 | 0.42   | 0.24 | -0.04         | 0.88          | 1    |
| Odds Ratio                                         | 31.93 | 45.72 | 13.79 | 1.52   |      | 0.96          | 2.40          | 2    |
| Group Assignment (Bridge Clinic vs Usual Care)     | 1.00  | 2.00  |       | 0.15   | 0.27 | -0.37         | 0.68          | 1    |
| Odds Ratio                                         | 1.00  | 2.00  |       | 1.16   |      | 0.69          | 1.97          | 2    |
| Race (Black or African American vs White)          | 1.00  | 2.00  |       | 0.53   | 0.40 | -0.26         | 1.31          | 1    |
| Odds Ratio                                         | 1.00  | 2.00  |       | 1.69   |      | 0.77          | 3.72          | 2    |
| Race (Other vs White)                              | 1.00  | 3.00  |       | -0.37  | 1.22 | -2.77         | 2.02          | 1    |
| Odds Ratio                                         | 1.00  | 3.00  |       | 0.69   |      | 0.06          | 7.57          | 2    |
| Ethnicity (Hispanic/Latino vs Non-Hispanic/Latino) | 2.00  | 1.00  |       | -0.86  | 1.20 | -3.21         | 1.48          | 1    |
| Odds Ratio                                         | 2.00  | 1.00  |       | 0.42   |      | 0.04          | 4.41          | 2    |
| ADI Quartile (2 vs 1)                              | 1.00  | 2.00  |       | 0.14   | 0.35 | -0.54         | 0.83          | 1    |
| Odds Ratio                                         | 1.00  | 2.00  |       | 1.15   |      | 0.58          | 2.28          | 2    |
| ADI Quartile (3 vs 1)                              | 1.00  | 3.00  |       | -0.66  | 0.40 | -1.44         | 0.12          | 1    |
| Odds Ratio                                         | 1.00  | 3.00  |       | 0.52   |      | 0.24          | 1.13          | 2    |
| ADI Quartile (4 vs 1)                              | 1.00  | 4.00  |       | -0.45  | 0.37 | -1.17         | 0.27          | 1    |
| Odds Ratio                                         | 1.00  | 4.00  |       | 0.64   |      | 0.31          | 1.31          | 2    |

- 1253 The adjusted OR (95% CI) for a subject in Bridge Clinic to have an ED visit within the 16 week  
 1254 follow up period vs a subject in usual care is 1.165 (0.687-1.974).

1255 **Readmission or ED visit: yes/no within 16 week follow up**1256 *Unadjusted*

- 1257 • Outcome: Readmission or ED visit (yes/no)
- 1258 • Predictor: Group assignment (Bridge Clinic or usual care)
- 1259 • Model: binary logistic regression
- 1260 • Number of observations included in this analysis: 335

|                                                | Low | High | Diff. | Effect | S.E. | Lower 0.95 | Upper 0.95 | Type |
|------------------------------------------------|-----|------|-------|--------|------|------------|------------|------|
| Group Assignment (Bridge Clinic vs Usual Care) | 1   | 2    |       | 0.45   | 0.23 | 0          | 0.90       | 1    |
| Odds Ratio                                     | 1   | 2    |       | 1.57   |      | 1          | 2.46       | 2    |

1261 The unadjusted OR (95% CI) for a subject in Bridge Clinic to have a readmission or ED visit  
 1262 within the 16 week follow up period vs a subject in usual care is 1.571 (1.002-2.462).

1263 *Adjusted - Proportional odds model*

- 1264 • Binary logistic regression model
- 1265 • Single imputation was used to impute missing data for race and ethnicity
- 1266 • Outcome: Readmission or ED visit (yes/no)
- 1267 • Predictor: Group assignment (Bridge Clinic or usual care)
- 1268 • Adjusted for age, race, ethnicity, area deprivation index (quartiles)
  - 1269 – Restricted cubic splines are used for continuous covariates (with 3 knots)
  - 1270 • Age
- 1271 • Number of observations included in this analysis: 335

|                                                | Low   | High  | Diff. | Effect | S.E. | Lower 0.95 | Upper 0.95 | Type |
|------------------------------------------------|-------|-------|-------|--------|------|------------|------------|------|
| Age                                            | 31.93 | 45.72 | 13.79 | 0.28   | 0.20 | -0.11      | 0.67       | 1    |
| Odds Ratio                                     | 31.93 | 45.72 | 13.79 | 1.32   |      | 0.89       | 1.95       | 2    |
| Group Assignment (Bridge Clinic vs Usual Care) | 1.00  | 2.00  |       | 0.48   | 0.24 | 0.01       | 0.94       | 1    |
| Odds Ratio                                     | 1.00  | 2.00  |       | 1.61   |      | 1.01       | 2.57       | 2    |
| Race (Black or African American vs White)      | 1.00  | 2.00  |       | 0.17   | 0.38 | -0.58      | 0.91       | 1    |
| Odds Ratio                                     | 1.00  | 2.00  |       | 1.18   |      | 0.56       | 2.49       | 2    |
| Race (Other vs White)                          | 1.00  | 3.00  |       | -1.00  | 1.19 | -3.33      | 1.33       | 1    |

|                                                    | Low  | High | Diff. | Effect | S.E. | Lower<br>0.95 | Upper<br>0.95 | Type |
|----------------------------------------------------|------|------|-------|--------|------|---------------|---------------|------|
| Odds Ratio                                         | 1.00 | 3.00 |       | 0.37   |      | 0.04          | 3.79          | 2    |
| Ethnicity (Hispanic/Latino vs Non-Hispanic/Latino) | 2.00 | 1.00 |       | -1.47  | 1.16 | -3.74         | 0.80          | 1    |
| Odds Ratio                                         | 2.00 | 1.00 |       | 0.23   |      | 0.02          | 2.23          | 2    |
| ADI Quartile (2 vs 1)                              | 1.00 | 2.00 |       | 0.04   | 0.32 | -0.58         | 0.66          | 1    |
| Odds Ratio                                         | 1.00 | 2.00 |       | 1.04   |      | 0.56          | 1.94          | 2    |
| ADI Quartile (3 vs 1)                              | 1.00 | 3.00 |       | -0.98  | 0.35 | -1.67         | -0.30         | 1    |
| Odds Ratio                                         | 1.00 | 3.00 |       | 0.37   |      | 0.19          | 0.74          | 2    |
| ADI Quartile (4 vs 1)                              | 1.00 | 4.00 |       | -0.50  | 0.31 | -1.12         | 0.11          | 1    |
| Odds Ratio                                         | 1.00 | 4.00 |       | 0.60   |      | 0.33          | 1.12          | 2    |

1272 The adjusted OR (95% CI) for a subject in Bridge Clinic to have a readmission or ED visit within  
 1273 the 16 week follow up period vs a subject in usual care is 1.611 (1.011-2.568).

1274

1275

1276

1277

1278

1279

1280

1281

1282

1283

1284 [Exploratory outcome: Index hospital length of stay from time of randomization](#)1285 [Table 7: LOS from time of randomization](#)

|                                                             | Overall            | Bridge Clinic      | Usual Care         |
|-------------------------------------------------------------|--------------------|--------------------|--------------------|
| n                                                           | 335                | 167                | 168                |
| Length of stay from randomization (hours)<br>(mean (SD))    | 125.8 (181.6)      | 120.8 (170.2)      | 130.7 (192.6)      |
| Length of stay from randomization (hours)<br>(median [IQR]) | 56.4 [27.5, 148.3] | 56.4 [26.3, 145.7] | 57.0 [28.2, 151.2] |

1286 [Figure 6: Index hospital length of stay from randomization, overall and by group](#)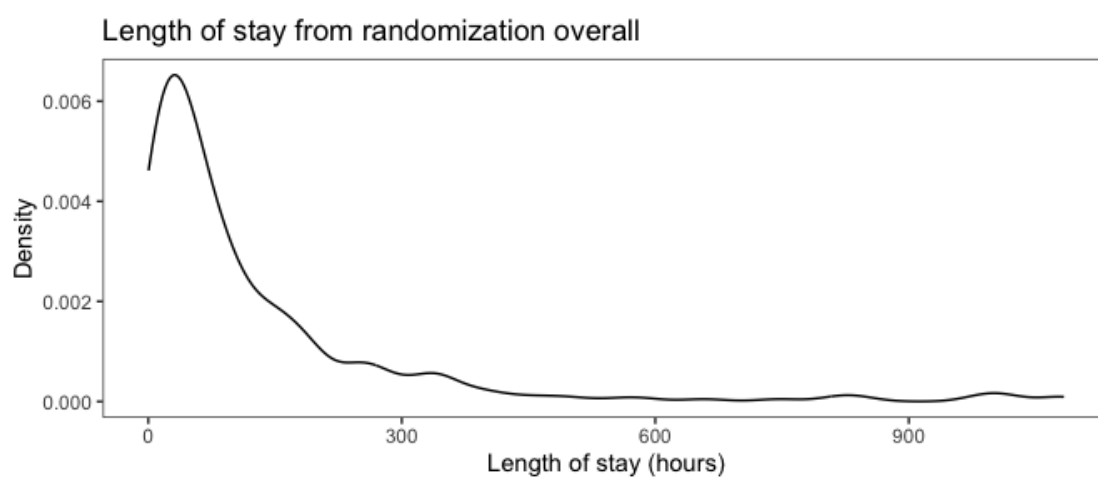

1287

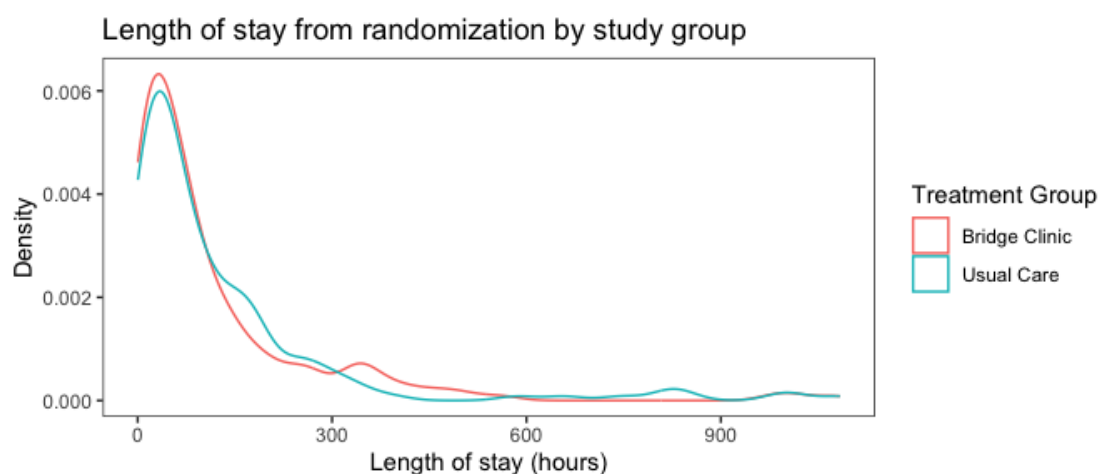

1288

1289 [Analysis](#)

- 1290
- Since the data are positive and skewed, a proportional odds model is used

1291 [Unadjusted](#)

- 1292
- Outcome: index hospital length of stay from time of randomization (hours)



1293 • Predictor: Group assignment (Bridge Clinic or usual care)

1294 • Number of observations included in this analysis: 335

|                                                | Low | High | Diff. | Effect | S.E. | Lower 0.95 | Upper 0.95 | Type |
|------------------------------------------------|-----|------|-------|--------|------|------------|------------|------|
| Group Assignment (Bridge Clinic vs Usual Care) | 2   | 1    |       | -0.09  | 0.19 | -0.47      | 0.28       | 1    |
| Odds Ratio                                     | 2   | 1    |       | 0.91   |      | 0.63       | 1.32       | 2    |

1295 The unadjusted OR (95% CI) for the index hospital length of stay being longer for a subject in  
1296 Bridge Clinic vs Usual Care is 0.91 (0.628-1.319),  $p = 0.618$ .

1297 *Adjusted*

### 1298 Multiple Imputation

1299 • Multiple imputation was used to impute missing data for race and ethnicity

### 1300 Proportional Odds Model

1301 • Outcome: index hospital length of stay (hours)

1302 • Predictor: Group assignment (Bridge Clinic or usual care)

1303 • Adjusted for age, race, ethnicity, area deprivation index (quartiles)

1304 – Restricted cubic splines are used for continuous covariates (with 3 knots)

1305 • Age

1306 • Number of observations included in this analysis: 335

1307

|                                                | Low   | High  | Diff. | Effect | S.E. | Lower 0.95 | Upper 0.95 | Type |
|------------------------------------------------|-------|-------|-------|--------|------|------------|------------|------|
| Age                                            | 31.93 | 45.72 | 13.79 | 0.26   | 0.16 | -0.05      | 0.58       | 1    |
| Odds Ratio                                     | 31.93 | 45.72 | 13.79 | 1.30   |      | 0.95       | 1.79       | 2    |
| Group Assignment (Bridge Clinic vs Usual Care) | 2.00  | 1.00  |       | -0.06  | 0.19 | -0.44      | 0.31       | 1    |
| Odds Ratio                                     | 2.00  | 1.00  |       | 0.94   |      | 0.65       | 1.36       | 2    |
| Race (Black or African American vs White)      | 1.00  | 2.00  |       | -0.13  | 0.31 | -0.75      | 0.48       | 1    |
| Odds Ratio                                     | 1.00  | 2.00  |       | 0.88   |      | 0.47       | 1.62       | 2    |
| Race (Other vs White)                          | 1.00  | 3.00  |       | -0.44  | 0.72 | -1.84      | 0.96       | 1    |
| Odds Ratio                                     | 1.00  | 3.00  |       | 0.64   |      | 0.16       | 2.62       | 2    |

|                                                    | Low  | High | Diff. | Effect | S.E. | Lower<br>0.95 | Upper<br>0.95 | Type |
|----------------------------------------------------|------|------|-------|--------|------|---------------|---------------|------|
| Ethnicity (Hispanic/Latino vs Non-Hispanic/Latino) | 2.00 | 1.00 |       | 0.75   | 0.66 | -0.55         | 2.05          | 1    |
| Odds Ratio                                         | 2.00 | 1.00 |       | 2.13   |      | 0.58          | 7.80          | 2    |
| ADI Quartile (2 vs 1)                              | 1.00 | 2.00 |       | 0.15   | 0.26 | -0.37         | 0.66          | 1    |
| Odds Ratio                                         | 1.00 | 2.00 |       | 1.16   |      | 0.69          | 1.94          | 2    |
| ADI Quartile (3 vs 1)                              | 1.00 | 3.00 |       | 0.12   | 0.26 | -0.39         | 0.63          | 1    |
| Odds Ratio                                         | 1.00 | 3.00 |       | 1.12   |      | 0.67          | 1.88          | 2    |
| ADI Quartile (4 vs 1)                              | 1.00 | 4.00 |       | 0.08   | 0.26 | -0.42         | 0.59          | 1    |
| Odds Ratio                                         | 1.00 | 4.00 |       | 1.09   |      | 0.66          | 1.80          | 2    |

1308 The adjusted OR (95% CI) for the index hospital length of stay being longer for a subject in  
1309 Bridge Clinic vs Usual Care is 0.938 (0.646-1.364),  $p = 0.739$ .

1310

1311

1312

1313

1314

1315

1316

1317

1318

1319

1320

## 1321 Propensity Score Analysis

- 1322 • 16-week follow up for secondary outcomes has a poor response rate
- 1323 • We see a difference in rates of follow up between treatment arms (subjects in Bridge Clinic had a
- 1324 better response rate)
- 1325 • Estimate the propensity score using IPTW for the probability of following up
  - 1326 – Include age, race, ethnicity, deprivation index (same variables used in adjusted
  - 1327 models)
- 1328 • 16-week follow up (yes/no):
  - 1329 – Considered not to have followed up if they are missing all of the following:
    - 1330 • Linkage to MOUD provider: yes/no
    - 1331 • Recurrent opioid use: yes/no
    - 1332 • Opioid use in the last 30 days
    - 1333 • Self-reported buprenorphine-naloxone (or naltrexone) prescriptions filled
    - 1334 • Overdose: yes/no
    - 1335 • Quality of Life
- 1336 • N = 247 with no 16-week follow up

## 1337 SMDs between groups

| 1338 | ##                                     | Stratified by follow_up |               |
|------|----------------------------------------|-------------------------|---------------|
| 1339 | ##                                     | No                      | Yes           |
| 1340 | SMD                                    |                         |               |
| 1341 | ## n                                   | 333.91                  | 335.30        |
| 1342 | ## AGE (mean (SD))                     | 39.91 (9.96)            | 39.81 (10.54) |
| 1343 | 0.009                                  |                         |               |
| 1344 | ## RACE_2 (%)                          |                         |               |
| 1345 | 0.023                                  |                         |               |
| 1346 | ## White                               | 289.2 (86.6)            | 289.4 (86.3)  |
| 1347 | ## Black or African American           | 36.2 (10.9)             | 36.0 (10.8)   |
| 1348 | ## Other                               | 8.5 ( 2.6)              | 9.8 ( 2.9)    |
| 1349 | ## ETHNICITY = Non-Hispanic/Latino (%) | 320.9 (96.1)            | 323.2 (96.4)  |
| 1350 | 0.016                                  |                         |               |
| 1351 | ## quartile_grp (%)                    |                         |               |
| 1352 | 0.032                                  |                         |               |
| 1353 | ## Quartile 1                          | 107.6 (32.2)            | 111.5 (33.2)  |
| 1354 | ## Quartile 2                          | 73.5 (22.0)             | 73.2 (21.8)   |
| 1355 | ## Quartile 3                          | 75.0 (22.5)             | 71.4 (21.3)   |
| 1356 | ## Quartile 4                          | 77.7 (23.3)             | 79.3 (23.6)   |

1357

1358

1359 **Linkage to MOUD Provider**

- 1360 • Binary logistic regression model
- 1361 • Single imputation was used to impute missing data for race and ethnicity
- 1362 • Outcome: Linkage to MOUD provider (yes/no)
- 1363 • Predictor: Group assignment (Bridge Clinic or usual care)
- 1364 • Adjusted for age, race, ethnicity, area deprivation index (quartiles)
- 1365 – Restricted cubic splines are used for continuous covariates (with 3 knots)
- 1366 • Age
- 1367 • Adjusted for propensity score weights
- 1368 • Number of observations included in this analysis: 88
- 1369

|                                                       | Low   | High  | Diff.     | Effect | S.E.  | Lower<br>0.95 | Upper 0.95 | Type |
|-------------------------------------------------------|-------|-------|-----------|--------|-------|---------------|------------|------|
| Age                                                   | 31.93 | 45.72 | 13.79     | 0.53   | 0.27  | 0.00          | 1.05       | 1    |
| Odds Ratio                                            | 31.93 | 45.72 | 13.79     | 1.70   |       | 1.00          | 2.87       | 2    |
| Group Assignment (Bridge<br>Clinic vs Usual Care)     | 1.00  | 2.00  |           | 0.86   | 0.30  | 0.28          | 1.45       | 1    |
| Odds Ratio                                            | 1.00  | 2.00  |           | 2.37   |       | 1.32          | 4.26       | 2    |
| Race (Black or African<br>American vs White)          | 1.00  | 2.00  |           | -1.75  | 0.43  | -2.58         | -0.91      | 1    |
| Odds Ratio                                            | 1.00  | 2.00  |           | 0.17   |       | 0.08          | 0.40       | 2    |
| Race (Other vs White)                                 | 1.00  | 3.00  |           | 16.63  | 44.73 | -71.03        | 104.29     | 1    |
| Odds Ratio                                            | 1.00  | 3.00  | 1.667e+07 |        |       | 0.00          | 1.968e+45  | 2    |
| Ethnicity (Hispanic/Latino<br>vs Non-Hispanic/Latino) | 2.00  | 1.00  |           | -8.49  | 32.26 | -71.71        | 54.73      | 1    |
| Odds Ratio                                            | 2.00  | 1.00  |           | 0.00   |       | 0.00          | 5.882e+23  | 2    |
| ADI Quartile (2 vs 1)                                 | 1.00  | 2.00  |           | 0.91   | 0.40  | 0.12          | 1.71       | 1    |
| Odds Ratio                                            | 1.00  | 2.00  |           | 2.49   |       | 1.13          | 5.51       | 2    |
| ADI Quartile (3 vs 1)                                 | 1.00  | 3.00  |           | -0.51  | 0.37  | -1.24         | 0.21       | 1    |
| Odds Ratio                                            | 1.00  | 3.00  |           | 0.60   |       | 0.29          | 1.24       | 2    |

|                       | Low  | High | Diff. | Effect | S.E. | Lower<br>0.95 | Upper 0.95 | Type |
|-----------------------|------|------|-------|--------|------|---------------|------------|------|
| ADI Quartile (4 vs 1) | 1.00 | 4.00 |       | 0.16   | 0.37 | -0.55         | 0.88       | 1    |
| Odds Ratio            | 1.00 | 4.00 |       | 1.18   |      | 0.57          | 2.42       | 2    |

1370 The adjusted OR (95% CI) for a subject in Bridge Clinic to attend at least one visit with a MOUD  
 1371 provider in the 16-week follow-up vs a subject in usual care is 2.371 (1.321-4.256).

1372

1373

1374

1375

1376

1377

1378

1379

1380

1381

1382

1383

1384

1385

1386

1387

1388

1389

1390

1391

1392

1393 **Recurrent opioid use**

- 1394 • Binary logistic regression model
- 1395 • Single imputation was used to impute missing data for race and ethnicity
- 1396 • Outcome: recurrent opioid use (yes/no)
- 1397 • Predictor: Group assignment (Bridge Clinic or usual care)
- 1398 • Adjusted for age, race, ethnicity, area deprivation index (quartiles)
- 1399 – Restricted cubic splines are used for continuous covariates (with 3 knots)
- 1400 • Age
- 1401 • Adjusted for propensity score weights
- 1402 • Number of observations included in this analysis: 88
- 1403

|                                                    | Low   | High  | Diff. | Effect | S.E. | Lower<br>0.95 | Upper<br>0.95 | Type |
|----------------------------------------------------|-------|-------|-------|--------|------|---------------|---------------|------|
| Age                                                | 31.93 | 45.72 | 13.79 | 0.04   | 0.23 | -0.42         | 0.50          | 1    |
| Odds Ratio                                         | 31.93 | 45.72 | 13.79 | 1.04   |      | 0.66          | 1.64          | 2    |
| Group Assignment (Bridge Clinic vs Usual Care)     | 1.00  | 2.00  |       | -0.36  | 0.27 | -0.88         | 0.16          | 1    |
| Odds Ratio                                         | 1.00  | 2.00  |       | 0.70   |      | 0.42          | 1.18          | 2    |
| Race (Black or African American vs White)          | 1.00  | 2.00  |       | 1.16   | 0.40 | 0.38          | 1.95          | 1    |
| Odds Ratio                                         | 1.00  | 2.00  |       | 3.20   |      | 1.46          | 7.03          | 2    |
| Race (Other vs White)                              | 1.00  | 3.00  |       | 1.86   | 0.95 | -0.01         | 3.73          | 1    |
| Odds Ratio                                         | 1.00  | 3.00  |       | 6.42   |      | 0.99          | 41.49         | 2    |
| Ethnicity (Hispanic/Latino vs Non-Hispanic/Latino) | 2.00  | 1.00  |       | -1.45  | 0.87 | -3.16         | 0.26          | 1    |
| Odds Ratio                                         | 2.00  | 1.00  |       | 0.23   |      | 0.04          | 1.30          | 2    |
| ADI Quartile (2 vs 1)                              | 1.00  | 2.00  |       | -0.27  | 0.33 | -0.91         | 0.37          | 1    |
| Odds Ratio                                         | 1.00  | 2.00  |       | 0.76   |      | 0.40          | 1.45          | 2    |
| ADI Quartile (3 vs 1)                              | 1.00  | 3.00  |       | 0.68   | 0.33 | 0.02          | 1.33          | 1    |
| Odds Ratio                                         | 1.00  | 3.00  |       | 1.97   |      | 1.02          | 3.79          | 2    |

|                       | Low  | High | Diff. | Effect | S.E. | Lower<br>0.95 | Upper<br>0.95 | Type |
|-----------------------|------|------|-------|--------|------|---------------|---------------|------|
| ADI Quartile (4 vs 1) | 1.00 | 4.00 |       | -0.62  | 0.33 | -1.27         | 0.03          | 1    |
| Odds Ratio            | 1.00 | 4.00 |       | 0.54   |      | 0.28          | 1.03          | 2    |

1404 The adjusted OR (95% CI) for a subject in Bridge Clinic to have recurrent opioid use in the 16-  
1405 week follow-up vs a subject in usual care is 0.699 (0.416-1.175).

1406

1407

1408

1409

1410

1411

1412

1413

1414

1415

1416

1417

1418

1419

1420

1421

1422

1423

1424

1425

1426

1427

## 1428 Opioid use in last 30 days

- 1429 • Proportional odds model
- 1430 • Single imputation was used to impute missing data for race and ethnicity
- 1431 • Outcome: opioid use in past 30 days (no use, single use, multiple use)
- 1432 • Predictor: Group assignment (Bridge Clinic or usual care)
- 1433 • Adjusted for age, race, ethnicity, area deprivation index (quartiles)
- 1434 – Restricted cubic splines are used for continuous covariates (with 3 knots)
- 1435 • Age
- 1436 • Adjusted for propensity score weights
- 1437 – This model was not adjusted for ethnicity because all subjects in this model (N =
- 1438 32) are Non-Hispanic/Latino
- 1439 • Number of observations included in this analysis: 32
- 1440
- 1441

|                                                | Low   | High  | Diff. | Effect    | S.E.  | Lower 0.95 | Upper 0.95 | Type |
|------------------------------------------------|-------|-------|-------|-----------|-------|------------|------------|------|
| Age                                            | 31.93 | 45.72 | 13.79 | 2.49      | 0.60  | 1.32       | 3.67       | 1    |
| Odds Ratio                                     | 31.93 | 45.72 | 13.79 | 12.08     |       | 3.73       | 39.10      | 2    |
| Group Assignment (Bridge Clinic vs Usual Care) | 1.00  | 2.00  |       | 3.85      | 0.83  | 2.23       | 5.47       | 1    |
| Odds Ratio                                     | 1.00  | 2.00  |       | 46.94     |       | 9.28       | 237.35     | 2    |
| Race (Black or African American vs White)      | 1.00  | 2.00  |       | 3.30      | 1.04  | 1.26       | 5.34       | 1    |
| Odds Ratio                                     | 1.00  | 2.00  |       | 27.22     |       | 3.54       | 209.44     | 2    |
| Race (Other vs White)                          | 1.00  | 3.00  |       | 10.33     | 47.89 | -83.54     | 104.20     | 1    |
| Odds Ratio                                     | 1.00  | 3.00  |       | 30,712.09 |       | 0.00       | 1.794e+45  | 2    |
| ADI Quartile (2 vs 1)                          | 1.00  | 2.00  |       | 0.33      | 0.80  | -1.24      | 1.90       | 1    |
| Odds Ratio                                     | 1.00  | 2.00  |       | 1.39      |       | 0.29       | 6.66       | 2    |
| ADI Quartile (3 vs 1)                          | 1.00  | 3.00  |       | -1.18     | 0.87  | -2.89      | 0.53       | 1    |
| Odds Ratio                                     | 1.00  | 3.00  |       | 0.31      |       | 0.06       | 1.70       | 2    |



|                       | Low  | High | Diff. | Effect    | S.E.  | Lower<br>0.95 | Upper 0.95 | Type |
|-----------------------|------|------|-------|-----------|-------|---------------|------------|------|
| ADI Quartile (4 vs 1) | 1.00 | 4.00 |       | 9.66      | 24.10 | -37.59        | 56.90      | 1    |
| Odds Ratio            | 1.00 | 4.00 |       | 15,605.84 |       | 0.00          | 5.132e+24  | 2    |

1442 The adjusted OR (95% CI) for a subject in Bridge Clinic to have more opioid uses in the past 30  
 1443 days vs a subject in usual care is 46.943 (9.284-237.351).

1444

1445

1446

1447

1448

1449

1450

1451

1452

1453

1454

1455

1456

1457

1458

1459

1460

1461

1462

1463

1464

1465

1466 **Overdose**

- 1467 • Binary logistic regression model
- 1468 • Single imputation was used to impute missing data for race and ethnicity
- 1469 • Outcome: Overdose (yes/no)
- 1470 • Predictor: Group assignment (Bridge Clinic or usual care)
- 1471 • Adjusted for age, race, ethnicity, area deprivation index (quartiles)
- 1472 – Restricted cubic splines are used for continuous covariates (with 3 knots)
- 1473 • Age
- 1474 • Adjusted for propensity score weights
- 1475 • Number of observations included in this analysis: 86
- 1476

|                                                       | Low   | High  | Diff. | Effect | S.E.  | Lower 0.95 | Upper 0.95 | Type |
|-------------------------------------------------------|-------|-------|-------|--------|-------|------------|------------|------|
| Age                                                   | 31.93 | 45.72 | 13.79 | -1.27  | 0.87  | -2.97      | 0.44       | 1    |
| Odds Ratio                                            | 31.93 | 45.72 | 13.79 | 0.28   |       | 0.05       | 1.55       | 2    |
| Group Assignment<br>(Bridge Clinic vs Usual<br>Care)  | 1.00  | 2.00  |       | -2.18  | 0.66  | -3.48      | -0.88      | 1    |
| Odds Ratio                                            | 1.00  | 2.00  |       | 0.11   |       | 0.03       | 0.41       | 2    |
| Race (Black or African<br>American vs White)          | 1.00  | 2.00  |       | -0.28  | 0.66  | -1.57      | 1.01       | 1    |
| Odds Ratio                                            | 1.00  | 2.00  |       | 0.76   |       | 0.21       | 2.74       | 2    |
| Race (Other vs White)                                 | 1.00  | 3.00  |       | -4.23  | 95.07 | -190.57    | 182.10     | 1    |
| Odds Ratio                                            | 1.00  | 3.00  |       | 0.01   |       | 0.00       | 1.219e+79  | 2    |
| Ethnicity (Hispanic/Latino<br>vs Non-Hispanic/Latino) | 2.00  | 1.00  |       | -9.78  | 90.11 | -186.39    | 166.83     | 1    |
| Odds Ratio                                            | 2.00  | 1.00  |       | 0.00   |       | 0.00       | 2.827e+72  | 2    |
| ADI Quartile (2 vs 1)                                 | 1.00  | 2.00  |       | 0.88   | 0.71  | -0.51      | 2.27       | 1    |
| Odds Ratio                                            | 1.00  | 2.00  |       | 2.41   |       | 0.60       | 9.68       | 2    |
| ADI Quartile (3 vs 1)                                 | 1.00  | 3.00  |       | 1.21   | 0.69  | -0.14      | 2.57       | 1    |
| Odds Ratio                                            | 1.00  | 3.00  |       | 3.37   |       | 0.87       | 13.12      | 2    |

|                       | Low  | High | Diff. | Effect | S.E.  | Lower 0.95 | Upper 0.95 | Type |
|-----------------------|------|------|-------|--------|-------|------------|------------|------|
| ADI Quartile (4 vs 1) | 1.00 | 4.00 |       | -8.62  | 30.67 | -68.73     | 51.49      | 1    |
| Odds Ratio            | 1.00 | 4.00 |       | 0.00   |       | 0.00       | 2.309e+22  | 2    |

1477 The adjusted OR (95% CI) for a subject in Bridge Clinic to overdose during the 16-week follow-  
 1478 up vs a subject in usual care is 0.113 (0.031-0.414).

1479

1480

1481

1482

1483

1484

1485

1486

1487

1488

1489

1490

1491

1492

1493

1494

1495

1496

1497

1498

1499

1500 **Number of buprenorphine refills**

- 1501 • Proportional odds model
- 1502 • Single imputation was used to impute missing data for race and ethnicity
- 1503 • Outcome: Number of buprenorphine refills
- 1504 • Predictor: Group assignment (Bridge Clinic or usual care)
- 1505 • Adjusted for age, race, ethnicity, area deprivation index (quartiles)
- 1506 – Restricted cubic splines are used for continuous covariates (with 3 knots)
- 1507 • Age
- 1508 • Adjusted for propensity score weights
- 1509 • Number of observations included in this analysis: 77

1510

|                                                    | Low   | High  | Diff. | Effect | S.E. | Lower<br>0.95 | Upper<br>0.95 | Type |
|----------------------------------------------------|-------|-------|-------|--------|------|---------------|---------------|------|
| Age                                                | 31.93 | 45.72 | 13.79 | 0.62   | 0.23 | 0.17          | 1.07          | 1    |
| Odds Ratio                                         | 31.93 | 45.72 | 13.79 | 1.86   |      | 1.18          | 2.92          | 2    |
| Group Assignment (Bridge Clinic vs Usual Care)     | 1.00  | 2.00  |       | 1.82   | 0.26 | 1.31          | 2.33          | 1    |
| Odds Ratio                                         | 1.00  | 2.00  |       | 6.16   |      | 3.69          | 10.30         | 2    |
| Race (Black or African American vs White)          | 1.00  | 2.00  |       | -1.57  | 0.35 | -2.26         | -0.89         | 1    |
| Odds Ratio                                         | 1.00  | 2.00  |       | 0.21   |      | 0.10          | 0.41          | 2    |
| Race (Other vs White)                              | 1.00  | 3.00  |       | -0.35  | 0.79 | -1.90         | 1.21          | 1    |
| Odds Ratio                                         | 1.00  | 3.00  |       | 0.71   |      | 0.15          | 3.35          | 2    |
| Ethnicity (Hispanic/Latino vs Non-Hispanic/Latino) | 2.00  | 1.00  |       | -1.14  | 0.87 | -2.85         | 0.58          | 1    |
| Odds Ratio                                         | 2.00  | 1.00  |       | 0.32   |      | 0.06          | 1.78          | 2    |
| ADI Quartile (2 vs 1)                              | 1.00  | 2.00  |       | 0.73   | 0.32 | 0.11          | 1.35          | 1    |
| Odds Ratio                                         | 1.00  | 2.00  |       | 2.07   |      | 1.11          | 3.85          | 2    |
| ADI Quartile (3 vs 1)                              | 1.00  | 3.00  |       | 0.17   | 0.32 | -0.45         | 0.80          | 1    |
| Odds Ratio                                         | 1.00  | 3.00  |       | 1.19   |      | 0.64          | 2.23          | 2    |

|                       | Low  | High | Diff. | Effect | S.E. | Lower<br>0.95 | Upper<br>0.95 | Type |
|-----------------------|------|------|-------|--------|------|---------------|---------------|------|
| ADI Quartile (4 vs 1) | 1.00 | 4.00 |       | 0.18   | 0.29 | -0.40         | 0.75          | 1    |
| Odds Ratio            | 1.00 | 4.00 |       | 1.19   |      | 0.67          | 2.12          | 2    |

1511 The adjusted OR (95% CI) for the number of buprenorphine refills being greater for a subject in  
 1512 Bridge Clinic vs Usual Care is 6.165 (3.69-10.299).

1513

1514

1515

1516

1517

1518

1519

1520

1521

1522

1523

1524

1525

1526

1527

1528

1529

1530

1531

1532

1533

1534

1535 **Quality of Life**

- 1536 • Proportional odds model
- 1537 • Single imputation was used to impute missing data for race and ethnicity
- 1538 • Outcome: quality of life score
- 1539 • Predictor: Group assignment (Bridge Clinic or usual care)
- 1540 • Adjusted for age, race, ethnicity, area deprivation index (quartiles)
- 1541 – Restricted cubic splines are used for continuous covariates (with 3 knots)
- 1542 • Age
- 1543 • Adjusted for propensity score weights
- 1544 • Number of observations included in this analysis: 86
- 1545

|                                                    | Low   | High  | Diff. | Effect | S.E. | Lower<br>0.95 | Upper<br>0.95 | Type |
|----------------------------------------------------|-------|-------|-------|--------|------|---------------|---------------|------|
| Age                                                | 31.93 | 45.72 | 13.79 | -0.48  | 0.21 | -0.89         | -0.08         | 1    |
| Odds Ratio                                         | 31.93 | 45.72 | 13.79 | 0.62   |      | 0.41          | 0.92          | 2    |
| Group Assignment (Bridge Clinic vs Usual Care)     | 1.00  | 2.00  |       | -0.11  | 0.22 | -0.54         | 0.32          | 1    |
| Odds Ratio                                         | 1.00  | 2.00  |       | 0.90   |      | 0.58          | 1.38          | 2    |
| Race (Black or African American vs White)          | 1.00  | 2.00  |       | -1.06  | 0.30 | -1.64         | -0.47         | 1    |
| Odds Ratio                                         | 1.00  | 2.00  |       | 0.35   |      | 0.19          | 0.62          | 2    |
| Race (Other vs White)                              | 1.00  | 3.00  |       | -1.98  | 0.64 | -3.23         | -0.73         | 1    |
| Odds Ratio                                         | 1.00  | 3.00  |       | 0.14   |      | 0.04          | 0.48          | 2    |
| Ethnicity (Hispanic/Latino vs Non-Hispanic/Latino) | 2.00  | 1.00  |       | 0.66   | 0.63 | -0.57         | 1.89          | 1    |
| Odds Ratio                                         | 2.00  | 1.00  |       | 1.93   |      | 0.56          | 6.62          | 2    |
| ADI Quartile (2 vs 1)                              | 1.00  | 2.00  |       | -0.66  | 0.28 | -1.22         | -0.11         | 1    |
| Odds Ratio                                         | 1.00  | 2.00  |       | 0.51   |      | 0.30          | 0.89          | 2    |
| ADI Quartile (3 vs 1)                              | 1.00  | 3.00  |       | -0.73  | 0.30 | -1.32         | -0.14         | 1    |
| Odds Ratio                                         | 1.00  | 3.00  |       | 0.48   |      | 0.27          | 0.87          | 2    |

---

|                       | Low  | High | Diff. | Effect | S.E. | Lower<br>0.95 | Upper<br>0.95 | Type |
|-----------------------|------|------|-------|--------|------|---------------|---------------|------|
| ADI Quartile (4 vs 1) | 1.00 | 4.00 |       | -0.28  | 0.28 | -0.82         | 0.26          | 1    |
| Odds Ratio            | 1.00 | 4.00 |       | 0.76   |      | 0.44          | 1.30          | 2    |

---

1546 The adjusted OR (95% CI) for the quality of life score being greater for a subject in Bridge Clinic  
1547 vs Usual Care is 0.896 (0.583-1.376).

1548

1549
