# Supplementary material for: Effect of a Co-Located Bridging Recovery Initiative on Hospital Length of Stay Among Patients With Opioid Use Disorder: The BRIDGE Randomized Clinical Trial
Source: PubMed Central journal article supplement (PMC10900965; doi:10.1001/jamanetworkopen.2023.56430), 2024-02-27
Supplement: jamanetwopen-e2356430-s003.pdf [file jamanetwopen-e2356430-s003.pdf]

\*First name, last name, and suffix (if applicable) are required and will appear in PubMed.

| <b>*Group Name(s): Vanderbilt Learning Healthcare System Platform Investigators</b> |                   |                              |                          |                                                                |                                                 |                                                                |                                                                                                   |
|-------------------------------------------------------------------------------------|-------------------|------------------------------|--------------------------|----------------------------------------------------------------|-------------------------------------------------|----------------------------------------------------------------|---------------------------------------------------------------------------------------------------|
| <b>*First Name and Middle Initial(s)</b>                                            | <b>*Last Name</b> | <b>*Suffix (eg, Jr, III)</b> | <b>Academic Degrees</b>  | <b>Institution</b>                                             | <b>Location (city, state/province, country)</b> | <b>Role or Contribution, eg, chair, principal investigator</b> | <b>Group (if more than 1 Group listed in the byline) and/or Subgroup (eg, Steering Committee)</b> |
| Gordon R.                                                                           | Bernard           |                              | MD                       | Vanderbilt University Medical Center and Vanderbilt University | Nashville, Tennessee                            |                                                                | Vanderbilt Learning Healthcare System Platform Investigators                                      |
| Robert S.                                                                           | Dittus            |                              | MD, MPH                  | Vanderbilt University Medical Center and Vanderbilt University | Nashville, Tennessee                            |                                                                | Vanderbilt Learning Healthcare System Platform Investigators                                      |
| Shon                                                                                | Dwyer             |                              | MBA, BSN, RN             | Vanderbilt University Medical Center and Vanderbilt University | Nashville, Tennessee                            |                                                                | Vanderbilt Learning Healthcare System Platform Investigators                                      |
| Peter J.                                                                            | Embi              |                              | MD, MS, FACP, FACM       | Vanderbilt University Medical Center and Vanderbilt University | Nashville, Tennessee                            |                                                                | Vanderbilt Learning Healthcare System Platform Investigators                                      |
| Chad                                                                                | Fitzgerald        |                              | JD                       | Vanderbilt University Medical Center and Vanderbilt University | Nashville, Tennessee                            |                                                                | Vanderbilt Learning Healthcare System Platform Investigators                                      |
| Robert E.                                                                           | Freundlich        |                              | MD                       | Vanderbilt University Medical Center and Vanderbilt University | Nashville, Tennessee                            |                                                                | Vanderbilt Learning Healthcare System Platform Investigators                                      |
| Frank E.                                                                            | Harrell           | Jr.                          | PhD                      | Vanderbilt University Medical Center and Vanderbilt University | Nashville, Tennessee                            |                                                                | Vanderbilt Learning Healthcare System Platform Investigators                                      |
| Paul A.                                                                             | Harris            |                              | Phd, PFACMI, FIAHSI      | Vanderbilt University Medical Center and Vanderbilt University | Nashville, Tennessee                            |                                                                | Vanderbilt Learning Healthcare System Platform Investigators                                      |
| Tina                                                                                | Hartert           |                              | MD, MPH                  | Vanderbilt University Medical Center and Vanderbilt University | Nashville, Tennessee                            |                                                                | Vanderbilt Learning Healthcare System Platform Investigators                                      |
| Jim                                                                                 | Hayman            |                              | MS, MBA                  | Vanderbilt University Medical Center and Vanderbilt University | Nashville, Tennessee                            |                                                                | Vanderbilt Learning Healthcare System Platform Investigators                                      |
| Catherine H.                                                                        | Ivory             |                              | PhD, RN-BC, NEA-BC, FAAN | Vanderbilt University Medical Center and Vanderbilt University | Nashville, Tennessee                            |                                                                | Vanderbilt Learning Healthcare System Platform Investigators                                      |
| Ruth                                                                                | Kleinpell         |                              | PhD, RN, FAAN            | Vanderbilt University Medical Center and Vanderbilt University | Nashville, Tennessee                            |                                                                | Vanderbilt Learning Healthcare System Platform Investigators                                      |
| Sunil                                                                               | Kripalani         |                              | MD, MSc                  | Vanderbilt University Medical Center and Vanderbilt University | Nashville, Tennessee                            |                                                                | Vanderbilt Learning Healthcare System Platform Investigators                                      |
| Lee Ann                                                                             | Liska             |                              | MBA, RN                  | Vanderbilt University Medical Center and Vanderbilt University | Nashville, Tennessee                            |                                                                | Vanderbilt Learning Healthcare System Platform Investigators                                      |
| Patrick                                                                             | Luther            |                              | MHS                      | Vanderbilt University Medical Center and Vanderbilt University | Nashville, Tennessee                            |                                                                | Vanderbilt Learning Healthcare System Platform Investigators                                      |
| Jay                                                                                 | Morrison          |                              | MSN, RN, CPPS            | Vanderbilt University Medical Center and Vanderbilt University | Nashville, Tennessee                            |                                                                | Vanderbilt Learning Healthcare System Platform Investigators                                      |
| Thomas                                                                              | Nantais           |                              | MBA, BSN, RN             | Vanderbilt University Medical Center and Vanderbilt University | Nashville, Tennessee                            |                                                                | Vanderbilt Learning Healthcare System Platform Investigators                                      |
| Jill M.                                                                             | Pulley            |                              | MBA                      | Vanderbilt University Medical Center and Vanderbilt University | Nashville, Tennessee                            |                                                                | Vanderbilt Learning Healthcare System Platform Investigators                                      |

## Supplemental Online Content: Nonauthor Collaborators

\*First name, last name, and suffix (if applicable) are required and will appear in PubMed.

| *First Name and Middle Initial(s) | *Last Name | *Suffix (eg, Jr, III) | Academic Degrees   | Institution                                                    | Location (city, state/province, country) | Role or Contribution, eg, chair, principal investigator | Group (if more than 1 Group listed in the byline) and/or Subgroup (eg, Steering Committee) |
|-----------------------------------|------------|-----------------------|--------------------|----------------------------------------------------------------|------------------------------------------|---------------------------------------------------------|--------------------------------------------------------------------------------------------|
| Kris                              | Rehm       |                       | MD                 | Vanderbilt University Medical Center and Vanderbilt University | Nashville, Tennessee                     |                                                         | Vanderbilt Learning Healthcare System Platform Investigators                               |
| Russell L.                        | Rothman    |                       | MD, MPP            | Vanderbilt University Medical Center and Vanderbilt University | Nashville, Tennessee                     |                                                         | Vanderbilt Learning Healthcare System Platform Investigators                               |
| Patti                             | Runyan     |                       | DNP, MBA, RN, NEA- | Vanderbilt University Medical Center and Vanderbilt University | Nashville, Tennessee                     |                                                         | Vanderbilt Learning Healthcare System Platform Investigators                               |
| Wesley H.                         | Self       |                       | MD, MPH            | Vanderbilt University Medical Center and Vanderbilt University | Nashville, Tennessee                     |                                                         | Vanderbilt Learning Healthcare System Platform Investigators                               |
| Matthew W.                        | Semler     |                       | MD, MSc            | Vanderbilt University Medical Center and Vanderbilt University | Nashville, Tennessee                     |                                                         | Vanderbilt Learning Healthcare System Platform Investigators                               |
| Robin                             | Steaban    |                       | MSN, RN, NEA-BC    | Vanderbilt University Medical Center and Vanderbilt University | Nashville, Tennessee                     |                                                         | Vanderbilt Learning Healthcare System Platform Investigators                               |
| Cosby A.                          | Stone      | Jr.                   | MD, MPH            | Vanderbilt University Medical Center and Vanderbilt University | Nashville, Tennessee                     |                                                         | Vanderbilt Learning Healthcare System Platform Investigators                               |
| Philip D.                         | Walker     |                       | MLIS, MSHI         | Vanderbilt University Medical Center and Vanderbilt University | Nashville, Tennessee                     |                                                         | Vanderbilt Learning Healthcare System Platform Investigators                               |
| Consuelo H.                       | Wilkins    |                       | MD, MSCI           | Vanderbilt University Medical Center and Vanderbilt University | Nashville, Tennessee                     |                                                         | Vanderbilt Learning Healthcare System Platform Investigators                               |
| Adam                              | Wright     |                       | PhD                | Vanderbilt University Medical Center and Vanderbilt University | Nashville, Tennessee                     |                                                         | Vanderbilt Learning Healthcare System Platform Investigators                               |
| Autumn D.                         | Zuckerman  |                       | PharmD             | Vanderbilt University Medical Center and Vanderbilt University | Nashville, Tennessee                     |                                                         | Vanderbilt Learning Healthcare System Platform Investigators                               |
