# Supplementary material for: Effect of a Co-Located Bridging Recovery Initiative on Hospital Length of Stay Among Patients With Opioid Use Disorder: The BRIDGE Randomized Clinical Trial
Source: PubMed Central journal article supplement (PMC10900965; doi:10.1001/jamanetworkopen.2023.56430), 2024-02-27
Supplement: jamanetwopen-e2356430-s004.pdf [file jamanetwopen-e2356430-s004.pdf]

## Data Sharing Statement

Marcovitz. Effect of a Co-Located Bridging Recovery Initiative on Hospital Length of Stay Among Patients With Opioid Use Disorder. *JAMA Netw Open*. Published February 27, 2024. doi:10.1001/jamanetworkopen.2023.56430

### Data

**Data available:** Yes

**Data types:** Deidentified participant data

**How to access data:** [david.marcovitz@vumc.org](mailto:david.marcovitz@vumc.org)

**When available:** With publication

### Supporting Documents

**Document types:** None

### Additional Information

**Who can access the data:** Researchers whose proposed use of the data has been approved by the study team and following appropriate regulatory approvals.

**Types of analyses:** For any purpose

**Mechanisms of data availability:** With a signed data access agreement
